# Supplementary material
Source: Research Square preprint supplement (doi:10.21203/rs.3.rs-9620492/v1)
Supplement: Supplementary file 1 [file a6df6426d2814ef455b77e25.docx]

**Table S1**. Identified proteins by Bonferroni correction.

| **Protein** | **Beta** | **SE** | **OR** | **OR_Lower_95** | **OR_Upper_95** | **P_value** | **pBonferroni** |
| --- | --- | --- | --- | --- | --- | --- | --- |
| LEP | 1.24900149651156 | 0.0576893507302694 | 3.48685957721605 | 3.11406942948547 | 3.90427701967844 | 6.01650366054606e-104 | 1.75140421558496e-100 |
| FABP4 | 0.982528712188881 | 0.0495321756462193 | 2.67120241087014 | 2.42406443008596 | 2.94353657901139 | 1.45097642198119e-87 | 4.22379236438725e-84 |
| PON3 | -0.780555118 | 0.0446327177485408 | 0.458151612304597 | 0.41977549547563 | 0.500036095769406 | 1.75598449872017e-68 | 5.11167087577441e-65 |
| IL1RN | 0.684764233639596 | 0.0406171663622562 | 1.98330418400204 | 1.83153531959616 | 2.14764926681693 | 9.01221304942843e-64 | 2.62345521868862e-60 |
| IGFBP2 | -0.696395404 | 0.0426145815614639 | 0.498378522962219 | 0.458442692465417 | 0.54179324097033 | 4.98302054422974e-60 | 1.45055728042528e-56 |
| SSC4D | 0.65689671369098 | 0.0407206285060883 | 1.92879742660863 | 1.78083843057712 | 2.0890494325678 | 1.52529409930454e-58 | 4.44013112307551e-55 |
| APOF | -0.904652471 | 0.0562278378248161 | 0.404682499379463 | 0.362453519994616 | 0.451831521201509 | 3.04475420220733e-58 | 8.86327948262555e-55 |
| IGSF9 | 0.741649740663515 | 0.0467700876843287 | 2.09939611830527 | 1.91550322502215 | 2.3009431693879 | 1.25056729660888e-56 | 3.64040140042844e-53 |
| PRAP1 | 0.800801795008551 | 0.0512935196646926 | 2.22732607166406 | 2.014289437 | 2.46289403025881 | 6.01805578903189e-55 | 1.75185604018718e-51 |
| CDHR2 | 0.736329057434891 | 0.0476641010820472 | 2.08825556055985 | 1.90200276777507 | 2.29274707697211 | 7.74665112508965e-54 | 2.2550501425136e-50 |
| RBP5 | 0.634405517425008 | 0.0415254903131979 | 1.88590067305676 | 1.73848762878303 | 2.04581343562716 | 1.08011673202603e-52 | 3.14421980692778e-49 |
| CA14 | -0.645883875 | 0.0425922008654274 | 0.524199011031639 | 0.482215297950915 | 0.569838004588812 | 6.08806539442486e-52 | 1.77223583631708e-48 |
| IGFBP1 | -0.615844909 | 0.0406467526319011 | 0.540184296032966 | 0.498818715984552 | 0.584980202887311 | 7.44561731582e-52 | 2.1674192006352e-48 |
| ACY1 | 0.637358833913429 | 0.042556417968015 | 1.89147856719915 | 1.74010986962587 | 2.05601452679708 | 1.04115121171222e-50 | 3.03079117729428e-47 |
| ADH4 | 0.60440222019769 | 0.0404208531755443 | 1.83015785042765 | 1.69075867441633 | 1.98105016887654 | 1.49486412900786e-50 | 4.35154947954189e-47 |
| GSTA1 | 0.580470671942788 | 0.0392807059947867 | 1.78687926679161 | 1.65446962335026 | 1.92988584923313 | 2.04618387866389e-49 | 5.95644127079059e-46 |
| CKB | -0.656450651 | 0.0444833290419221 | 0.518689079952977 | 0.475381340234133 | 0.565942200276436 | 2.76408188889861e-49 | 8.04624237858386e-46 |
| CPM | 0.63175837830776 | 0.0432798352967346 | 1.88091503336613 | 1.72793991977062 | 2.04743308622232 | 2.93217531330752e-48 | 8.53556233703819e-45 |
| FURIN | 0.603014807506276 | 0.041330572779645 | 1.82762042683255 | 1.68540667504338 | 1.98183410214013 | 3.24995798322787e-48 | 9.46062768917633e-45 |
| ADIPOQ | -0.709266152 | 0.0486870992434391 | 0.492005121994551 | 0.447225263326931 | 0.541268707112182 | 4.49854322678725e-48 | 1.30952593331777e-44 |
| KRT18 | 0.599478424478841 | 0.0413632242645588 | 1.82116867563003 | 1.67934948130597 | 1.97496434304836 | 1.34095826678691e-47 | 3.9035295146167e-44 |
| HGF | 0.622719778810701 | 0.0430667895451524 | 1.86399079661089 | 1.71310732616992 | 2.02816346458463 | 2.18707556164799e-47 | 6.36657695995731e-44 |
| MXRA8 | -0.642777715 | 0.0448971908653841 | 0.525829788349002 | 0.481535073130696 | 0.574199018396549 | 1.72208215228572e-46 | 5.01298114530375e-43 |
| HSD11B1 | -0.554350355 | 0.0387624118363181 | 0.574445325583399 | 0.532418906042045 | 0.61978909527784 | 2.14961114051356e-46 | 6.25751803003497e-43 |
| PCBD1 | 0.588485689911497 | 0.041860198636936 | 1.80125868489174 | 1.65937280155349 | 1.95527662431276 | 6.84554421228928e-45 | 1.99273792019741e-41 |
| ADM | 0.652881658563164 | 0.0464897225386701 | 1.92106872457542 | 1.75375955788083 | 2.10433923393768 | 8.43542936050278e-45 | 2.45555348684236e-41 |
| PALM2 | 0.627132253948799 | 0.0447384004312107 | 1.87223378226902 | 1.71505472392609 | 2.04381777827192 | 1.21382243221237e-44 | 3.5334371001702e-41 |
| IGSF3 | 0.604098786230696 | 0.0431132918048681 | 1.82960260261565 | 1.6813494823798 | 1.99092795315816 | 1.31845195018243e-44 | 3.83801362698105e-41 |
| GPD1 | 0.567853621693253 | 0.0410163185788566 | 1.76447575163135 | 1.62817806360611 | 1.91218316207963 | 1.37184032760129e-43 | 3.99342719364735e-40 |
| GUSB | 0.58178662919038 | 0.0424885902587486 | 1.78923227140049 | 1.64626484629166 | 1.9446154901699 | 1.12146002093714e-42 | 3.26457012094802e-39 |
| FUOM | 0.578430411025553 | 0.0423672035921919 | 1.78323728342129 | 1.64113929378953 | 1.93763882262607 | 1.94302536698508e-42 | 5.65614684329356e-39 |
| ASGR1 | 0.587063055270615 | 0.0432123668769352 | 1.79869797379946 | 1.65262811246381 | 1.95767842538205 | 4.87963787584249e-42 | 1.42046258565775e-38 |
| RTN4R | 0.569354158423787 | 0.041987613736682 | 1.76712539975681 | 1.62752171164469 | 1.91870385268779 | 6.90886030157752e-42 | 2.01116923378922e-38 |
| OXT | 0.521724435469501 | 0.0386592749603563 | 1.68493070018092 | 1.56197689058356 | 1.8175630392019 | 1.6632923950719e-41 | 4.8418441620543e-38 |
| PLTP | -0.519760441 | 0.0387860562709238 | 0.594662987747963 | 0.55113190231129 | 0.641632370607354 | 5.98927062005794e-41 | 1.74347667749887e-37 |
| FCAMR | 0.547217232892998 | 0.0410265743451559 | 1.72843648313656 | 1.59489060420052 | 1.87316463484656 | 1.38925138415512e-40 | 4.04411077927557e-37 |
| GSTA3 | 0.505711402707165 | 0.0381745381083223 | 1.65816472384035 | 1.53862522704957 | 1.78699153182411 | 4.67428929361942e-40 | 1.36068561337261e-36 |
| COL6A3 | 0.594822585929653 | 0.0453636386565691 | 1.81270931629212 | 1.65849382169733 | 1.98126458017755 | 2.79899849407555e-39 | 8.14788461625393e-36 |
| WFIKKN2 | -0.518649938 | 0.0395696135598189 | 0.595323729764575 | 0.550897572832398 | 0.643332555267272 | 2.99142197896926e-39 | 8.70802938077951e-36 |
| UPB1 | 0.555141951232026 | 0.0424087771275347 | 1.742188273 | 1.60323064731046 | 1.89318984367572 | 3.74320539687402e-39 | 1.08964709103003e-35 |
| FTCD | 0.53367494040481 | 0.0409570845133625 | 1.70518726986991 | 1.57365203456577 | 1.84771700570307 | 8.24985761047526e-39 | 2.40153355040935e-35 |
| PLAT | 0.549737174569889 | 0.0424279724379992 | 1.73279753475638 | 1.59452892628369 | 1.88305602172787 | 2.14608515443444e-38 | 6.24725388455866e-35 |
| ADAMTSL2 | 0.587092395835239 | 0.0454646184720462 | 1.79875074938782 | 1.64539708415195 | 1.96639722385971 | 3.79350816592162e-38 | 1.10429022709978e-34 |
| INHBC | 0.549493712502659 | 0.0428783476209405 | 1.73237571563703 | 1.59273418271904 | 1.88426019400522 | 1.34826361432832e-37 | 3.92479538130974e-34 |
| APOM | -0.509715366 | 0.0400880811472729 | 0.600666524473174 | 0.555277102941902 | 0.6497661648772 | 4.88824316560058e-37 | 1.42296758550633e-33 |
| IL18R1 | 0.502538963990622 | 0.0399898471678306 | 1.65291263324472 | 1.52830436634409 | 1.7876806697056 | 3.22028576248694e-36 | 9.3742518545995e-33 |
| SERPINF1 | 0.557365153603783 | 0.0445121644918924 | 1.74606581878196 | 1.60018830220597 | 1.90524192641316 | 5.6850590020186e-36 | 1.65492067548761e-32 |
| CES1 | 0.515012273270683 | 0.0411982653648792 | 1.67365904294194 | 1.54382587989641 | 1.81441095689449 | 7.38812897245722e-36 | 2.1506843438823e-32 |
| NTRK3 | -0.499124833 | 0.0399384624388443 | 0.607061707535654 | 0.561353627718474 | 0.656491556407868 | 7.71840919561286e-36 | 2.2468289168429e-32 |
| LGALS9 | 0.527589927384161 | 0.0423988819562796 | 1.69484268850564 | 1.55969161456721 | 1.84170493189328 | 1.51732769863549e-35 | 4.4169409307279e-32 |
| AFM | 0.523012335962782 | 0.0420920068819512 | 1.68710212124782 | 1.553502412 | 1.8321912766462 | 1.9014158704461e-35 | 5.5350215988686e-32 |
| SHBG | -0.539380769 | 0.0435317227625499 | 0.583109219626531 | 0.535420453634869 | 0.635045523018696 | 2.94122546058429e-35 | 8.56190731576087e-32 |
| CFI | 0.518385615566523 | 0.0420274402748835 | 1.67931440114693 | 1.54652709412052 | 1.8235030402123 | 5.90865819456545e-35 | 1.720010400438e-31 |
| TNFRSF1A | 0.567266547534124 | 0.0462153272012432 | 1.7634401775223 | 1.61072519010371 | 1.93063427504953 | 1.24272195169809e-34 | 3.61756360139313e-31 |
| PTS | 0.479240426 | 0.0391898959395265 | 1.61484733960608 | 1.49545159222264 | 1.74377555501951 | 2.18478359316414e-34 | 6.35990503970081e-31 |
| ADGRG2 | -0.506636649 | 0.0416218730297043 | 0.602518656769667 | 0.555317354002781 | 0.653732013125068 | 4.36254035395104e-34 | 1.26993549703515e-30 |
| ADGRG1 | 0.597221886496068 | 0.0494828346052045 | 1.81706377251716 | 1.64910964086019 | 2.00212324977502 | 1.53482458476736e-33 | 4.46787436625778e-30 |
| GGH | 0.473241392134386 | 0.0392359107505018 | 1.60518881616714 | 1.48637312313733 | 1.73350223805816 | 1.68815346154353e-33 | 4.9142147265532e-30 |
| ADH1B | 0.482234146159656 | 0.0401542879755297 | 1.61968898486178 | 1.49710275205254 | 1.75231286168293 | 3.16637559910884e-33 | 9.21731936900583e-30 |
| CFB | 0.498410819102867 | 0.0416626365262858 | 1.64610323516905 | 1.51702632191525 | 1.78616271958489 | 5.55080156920422e-33 | 1.61583833679535e-29 |
| F9 | 0.490950652873313 | 0.0410462153659757 | 1.63386872388928 | 1.50757148905875 | 1.77074654587046 | 5.69251016293213e-33 | 1.65708970842954e-29 |
| ENPP6 | -0.472927635 | 0.0398055759255922 | 0.623175165821794 | 0.576403949144033 | 0.673741545098228 | 1.48686949366051e-32 | 4.32827709604573e-29 |
| FSTL3 | 0.546603265804883 | 0.0460328844703935 | 1.72737560572725 | 1.5783481291302 | 1.89047424214701 | 1.6118567442882e-32 | 4.69211498262296e-29 |
| APOD | -0.647567995 | 0.0547658497545207 | 0.523316939976172 | 0.470053359343671 | 0.582616024802825 | 2.92319340466611e-32 | 8.50941600098305e-29 |
| GHR | 0.503849175536558 | 0.0429474208732647 | 1.65507971782082 | 1.52146278497605 | 1.80043107159205 | 8.76094290799133e-32 | 2.55031048051628e-28 |
| VSIG4 | 0.532435634047536 | 0.0454938057360517 | 1.70307532938696 | 1.55778941525411 | 1.86191121159555 | 1.22338418694947e-31 | 3.56127136820992e-28 |
| PLIN1 | 0.438699022722597 | 0.0374989615836458 | 1.55068849514294 | 1.44080366415939 | 1.66895384068281 | 1.29018126285526e-31 | 3.75571765617167e-28 |
| CALB2 | 0.457143180754447 | 0.0391384182805637 | 1.57955502994008 | 1.46291625864778 | 1.70549344698322 | 1.60982862585129e-31 | 4.68621112985312e-28 |
| SLITRK1 | -0.505106377 | 0.0433819158668654 | 0.603441379877447 | 0.554252493372782 | 0.656995689333744 | 2.4837526351098e-31 | 7.23020392080462e-28 |
| PAMR1 | 0.458005340929669 | 0.0394753652384275 | 1.58091744660777 | 1.46321142319992 | 1.70809216861023 | 4.01112994317331e-31 | 1.16763992645775e-27 |
| APOC1 | -0.519280356 | 0.0449359006058116 | 0.594948545300001 | 0.544790086525891 | 0.649725059814877 | 6.88220267269852e-31 | 2.00340919802254e-27 |
| BPIFB2 | 0.46033881748034 | 0.0398940784194789 | 1.58461078788472 | 1.46542664273006 | 1.71348826059468 | 8.38692639207901e-31 | 2.4414342727342e-27 |
| IL6 | 0.430935803432552 | 0.0374916882962063 | 1.53869676773533 | 1.42968207498985 | 1.65602394018681 | 1.41132570351719e-30 | 4.10836912293853e-27 |
| DCXR | 0.444584851503766 | 0.0387241350076018 | 1.55984249512977 | 1.44583288553568 | 1.68284221084872 | 1.64709550056374e-30 | 4.79469500214104e-27 |
| SCLY | 0.450520643794312 | 0.0394984819786281 | 1.56912893009514 | 1.45223481132444 | 1.69543215743191 | 3.90157719297686e-30 | 1.13574912087556e-26 |
| ITGA5 | 0.451672952275338 | 0.0398719998641315 | 1.57093809282571 | 1.45284518812433 | 1.69863004789721 | 9.52770926303744e-30 | 2.7735161664702e-26 |
| PRCP | 0.469386389219865 | 0.0414414181212863 | 1.59901272068411 | 1.47426743134561 | 1.73431334542599 | 9.69995009056687e-30 | 2.82365547136402e-26 |
| FGF21 | 0.460547724099362 | 0.0407458614403447 | 1.58494185814706 | 1.46328782 | 1.71670990406175 | 1.26907974549842e-29 | 3.69429113914589e-26 |
| APOA1 | -0.537397953 | 0.0477097276353019 | 0.584266565044785 | 0.53210788467097 | 0.641537982922987 | 1.97790036659058e-29 | 5.75766796714517e-26 |
| SORD | 0.439459675550757 | 0.0391582962076555 | 1.55186847945467 | 1.43721816449255 | 1.67566472302086 | 3.15683193509859e-29 | 9.189537763072e-26 |
| RIDA | 0.459629740135448 | 0.0410658030581621 | 1.58348757454418 | 1.46102868463938 | 1.71621058853798 | 4.43652733325881e-29 | 1.29147310671164e-25 |
| NCAN | -0.463899052 | 0.0414864772311477 | 0.628827030242812 | 0.57971855272566 | 0.68209553084826 | 4.99885422222409e-29 | 1.45516646408943e-25 |
| RARRES2 | 0.459649169963351 | 0.0413587072349592 | 1.58351834173414 | 1.46021853172458 | 1.71722949964685 | 1.07580051912198e-28 | 3.13165531116409e-25 |
| TNFRSF11A | 0.479884078335796 | 0.0433204531525172 | 1.61588707501656 | 1.48434855151718 | 1.75908214855381 | 1.61240894732766e-28 | 4.69372244567082e-25 |
| MET | -0.422122307 | 0.0381263314711253 | 0.655653843134181 | 0.608444294017733 | 0.706526408815485 | 1.72154567131559e-28 | 5.01141944919968e-25 |
| FAM20A | 0.466989217317221 | 0.0421940113291654 | 1.59518420295903 | 1.46856973110995 | 1.73271489086651 | 1.80028772645697e-28 | 5.24063757171623e-25 |
| CDH2 | 0.477603218132019 | 0.0431719204966841 | 1.61220566248302 | 1.48139802583059 | 1.75456363031468 | 1.90025746985585e-28 | 5.53164949475038e-25 |
| GHRL | -0.43134865 | 0.0390582902249086 | 0.649632376633757 | 0.601756199849275 | 0.701317618125962 | 2.35105613962619e-28 | 6.84392442245183e-25 |
| PRSS8 | 0.502364840363894 | 0.0458424160160032 | 1.65262484715826 | 1.51061024503772 | 1.80799044254904 | 6.04831408046527e-28 | 1.76066422882344e-24 |
| RNASE1 | 0.522602883615013 | 0.047841384164329 | 1.68641147472642 | 1.53546577370901 | 1.85219606375147 | 8.88446955587255e-28 | 2.5862690877145e-24 |
| CRELD1 | 0.461428954074309 | 0.0422625125318522 | 1.58633917200801 | 1.46023068915903 | 1.72333863911348 | 9.4386619681088e-28 | 2.74759449891647e-24 |
| FGFBP1 | -0.433033515 | 0.0399035518550299 | 0.648538755507073 | 0.599748740756615 | 0.701297874946849 | 1.95099542661862e-27 | 5.67934768688679e-24 |
| C19ORF12 | 0.402218112417689 | 0.0371254690250468 | 1.49513740514874 | 1.39020635523646 | 1.60798852044859 | 2.37491964444649e-27 | 6.91339108498373e-24 |
| GOLM2 | 0.408475899171173 | 0.0378140645134487 | 1.50452299206987 | 1.39704645444499 | 1.62026783466277 | 3.35974992375518e-27 | 9.78023202805132e-24 |
| APCS | 0.493219694725497 | 0.0460099457676233 | 1.63758024961594 | 1.49636704593741 | 1.79211984199523 | 8.21368640520668e-27 | 2.39100411255566e-23 |
| KYNU | 0.414338478105141 | 0.0387770326970857 | 1.51336928256991 | 1.40261099207646 | 1.6328736894009 | 1.19453561562585e-26 | 3.47729317708684e-23 |
| TNFRSF10A | 0.448101781033277 | 0.042153041870918 | 1.56533800926584 | 1.4412082423537 | 1.70015894389466 | 2.15292408401911e-26 | 6.26716200857962e-23 |
| COLEC12 | 0.474095703030352 | 0.044801156289916 | 1.60656073240093 | 1.47150463230507 | 1.75401241031058 | 3.60317125988314e-26 | 1.04888315375198e-22 |
| LPL | -0.47174361 | 0.0447717960068264 | 0.623913457808088 | 0.571496837289348 | 0.681137632677676 | 5.85631908450976e-26 | 1.70477448550079e-22 |
| CTSD | 0.415698090619258 | 0.0397205474833872 | 1.51542827778562 | 1.40192433461496 | 1.63812183611395 | 1.24328625183027e-25 | 3.61920627907793e-22 |
| HSPG2 | 0.454283749476983 | 0.0441809054720714 | 1.57504485222766 | 1.44439301537594 | 1.71751473464663 | 8.46340129017458e-25 | 2.46369611556982e-21 |
| NT5C1A | 0.441878561058321 | 0.0430988029642476 | 1.55562681528881 | 1.42961461399674 | 1.69274625815424 | 1.1509791728917e-24 | 3.35050037228774e-21 |
| LEPR | -0.392560768 | 0.0383643807473094 | 0.675325307273016 | 0.626407003528018 | 0.72806381166681 | 1.4191579555168e-24 | 4.13116880850939e-21 |
| SIT1 | 0.395842935939593 | 0.0386937898352213 | 1.48563595920973 | 1.37713204426643 | 1.6026888724913 | 1.45307269760107e-24 | 4.22989462271672e-21 |
| SELE | 0.400881937230561 | 0.0392151034749165 | 1.49314097373472 | 1.38267542273601 | 1.61243190613299 | 1.57003469707576e-24 | 4.57037100318753e-21 |
| CD163 | 0.387233749055504 | 0.0380461813756797 | 1.47290074019451 | 1.36706107320657 | 1.5869346534584 | 2.48637692919233e-24 | 7.23784324087888e-21 |
| MRC1 | 0.432512896887249 | 0.0426111158094938 | 1.54112535088441 | 1.41764225791354 | 1.67536438327832 | 3.30561864482055e-24 | 9.62265587507262e-21 |
| ADAMTS15 | 0.426891924926014 | 0.0420646268105609 | 1.53248702912475 | 1.41120684448749 | 1.66419012465073 | 3.36572529635832e-24 | 9.79762633769906e-21 |
| IFI30 | 0.428350386535698 | 0.0425406344588922 | 1.53472373330117 | 1.41194860967762 | 1.66817469234641 | 7.55862601894866e-24 | 2.20031603411595e-20 |
| CLMP | 0.448458836928835 | 0.0445749758316916 | 1.56589702222409 | 1.43489529916983 | 1.70885881752412 | 8.23468713061762e-24 | 2.39711742372279e-20 |
| HNMT | 0.401499039334069 | 0.0399774339217011 | 1.49406267853418 | 1.38146325737717 | 1.61583978109327 | 9.84862726216226e-24 | 2.86693539601543e-20 |
| FABP1 | 0.396190459140473 | 0.0395210030156289 | 1.4861523418959 | 1.37537895011279 | 1.60584745254501 | 1.18590111428204e-23 | 3.45215814367503e-20 |
| GGT1 | 0.406434073288881 | 0.0405633811700341 | 1.50145415216871 | 1.38670419119328 | 1.62569968806739 | 1.24845206848608e-23 | 3.63424397136297e-20 |
| RNASE6 | 0.487586329186142 | 0.0487022854022099 | 1.62838109689257 | 1.48012989349202 | 1.79148128037679 | 1.35583847405003e-23 | 3.94684579795964e-20 |
| CHGB | -0.387328054 | 0.0388543371413328 | 0.678868352781457 | 0.629088989219181 | 0.732586721920259 | 2.0890113199861e-23 | 6.08111195247953e-20 |
| ITGAV | -0.385314168 | 0.0388843084719522 | 0.680236894022531 | 0.630320150975689 | 0.734106677809936 | 3.79500277853326e-23 | 1.10472530883103e-19 |
| LRTM2 | -0.415726733 | 0.0424850661001168 | 0.659860563975435 | 0.607139034326796 | 0.717160220760265 | 1.30280824387295e-22 | 3.79247479791415e-19 |
| NOMO1 | 0.359963764522997 | 0.0368226959473584 | 1.43327747812628 | 1.33347895197041 | 1.5405449979308 | 1.43312669188575e-22 | 4.17183180007943e-19 |
| THBS4 | 0.3772093564559 | 0.0386121488591832 | 1.45820956300277 | 1.35192505675735 | 1.57284985510435 | 1.52670149631751e-22 | 4.44422805578026e-19 |
| DNER | -0.377982836 | 0.0387043413014294 | 0.685242262384789 | 0.635182230254047 | 0.739247629724182 | 1.57701096073538e-22 | 4.59067890670068e-19 |
| CDHR5 | 0.372141891251038 | 0.0382326679759705 | 1.45083882802525 | 1.34609238022091 | 1.56373614161626 | 2.16760121688425e-22 | 6.30988714235004e-19 |
| MENT | -0.393568335 | 0.0404610859854223 | 0.674645214086533 | 0.623209797306472 | 0.730325753633876 | 2.3112605736148e-22 | 6.72807952979268e-19 |
| CD72 | 0.390480851843016 | 0.0401926856797343 | 1.47769117359949 | 1.36574926197218 | 1.59880826249227 | 2.59683304156696e-22 | 7.55938098400142e-19 |
| KHK | 0.386616984895718 | 0.0398663324806571 | 1.47199258789372 | 1.3613528843976 | 1.59162418770857 | 3.07973639828083e-22 | 8.9651126553955e-19 |
| FABP3 | 0.423131675576271 | 0.0438862689066392 | 1.52673531648403 | 1.40089958155029 | 1.66387424002233 | 5.33756154139182e-22 | 1.55376416469916e-18 |
| PLA2G1B | -0.389917072 | 0.0404481195621787 | 0.677113023534756 | 0.625505355768695 | 0.732978610673831 | 5.42245329701631e-22 | 1.57847615476145e-18 |
| CST3 | 0.432277649650513 | 0.0448554556350489 | 1.54076284804472 | 1.41108788508716 | 1.68235457125212 | 5.57266478664119e-22 | 1.62220271939125e-18 |
| THY1 | 0.392639180821546 | 0.040753313527369 | 1.48088396158477 | 1.3671970379489 | 1.60402432627341 | 5.71507699301589e-22 | 1.66365891266692e-18 |
| ANGPTL2 | 0.376153474595714 | 0.039095057981963 | 1.4566706785599 | 1.34922069249599 | 1.57267782622781 | 6.487202128948e-22 | 1.88842453973676e-18 |
| YAP1 | 0.443420086329316 | 0.0461283698841251 | 1.55802670260505 | 1.42334321526354 | 1.70545458045472 | 7.06427155587552e-22 | 2.05640944991536e-18 |
| PTGR1 | 0.388425101763509 | 0.0404946717780282 | 1.47465653015486 | 1.36213802846601 | 1.59646954749316 | 8.63894784341521e-22 | 2.51479771721817e-18 |
| PLA2G15 | 0.374771321620354 | 0.0391743056344283 | 1.45465872757972 | 1.34714788871307 | 1.5707496047411 | 1.10304543726856e-21 | 3.21096526788877e-18 |
| LGALS1 | 0.370868198984453 | 0.0387851315927203 | 1.44899208217255 | 1.3429240199389 | 1.56343770982239 | 1.15365467885146e-21 | 3.3582887701366e-18 |
| NCAM2 | -0.354443622 | 0.0371433439596921 | 0.701563669542255 | 0.652303994997352 | 0.754543259272225 | 1.39311805645844e-21 | 4.05536666235052e-18 |
| ALDH1A1 | 0.371675586044578 | 0.039189421875878 | 1.45016245203709 | 1.3429441345467 | 1.5659408929978 | 2.44532097712773e-21 | 7.11832936441882e-18 |
| HAVCR2 | 0.397878205941384 | 0.0419706688863342 | 1.48866270859238 | 1.37110323243197 | 1.61630182726855 | 2.54500028051032e-21 | 7.40849581656553e-18 |
| BCAN | -0.377365465 | 0.039975518694539 | 0.685665441244313 | 0.633992926315288 | 0.74154943659885 | 3.73084898012229e-21 | 1.0860501381136e-17 |
| MOG | -0.371597299 | 0.0396123167715428 | 0.68963190203639 | 0.638114566832148 | 0.745308421130951 | 6.54414688602034e-21 | 1.90500115852052e-17 |
| CD300E | 0.383350479138228 | 0.0408802305530017 | 1.46719216021112 | 1.35421943722253 | 1.58958937954693 | 6.76163447820974e-21 | 1.96831179660686e-17 |
| BPIFB1 | -0.366852687 | 0.0391863130799258 | 0.692911712480025 | 0.641684928993959 | 0.748228015959092 | 7.84226012550693e-21 | 2.28288192253507e-17 |
| ITGA11 | -0.361549524 | 0.0386246441531918 | 0.696596097056297 | 0.645807487580402 | 0.751378904342068 | 7.92913797049348e-21 | 2.30817206321065e-17 |
| LDLR | 0.414238932098581 | 0.044294653344345 | 1.51321864019942 | 1.38738601448829 | 1.65046398704801 | 8.60914900974692e-21 | 2.50612327673733e-17 |
| LAIR1 | 0.402908823955491 | 0.0432173699987188 | 1.49617047053909 | 1.37465498379739 | 1.62842757149826 | 1.13262192519307e-20 | 3.29706242423703e-17 |
| TNFRSF1B | 0.412240404569034 | 0.0444094589640358 | 1.51019745105917 | 1.38430452429843 | 1.64753946920855 | 1.65212103980334e-20 | 4.80932434686753e-17 |
| SEZ6L | -0.362568804 | 0.0390797540617765 | 0.695886432177868 | 0.644574337386074 | 0.751283286351489 | 1.7323579064129e-20 | 5.04289386556797e-17 |
| VGF | -0.38182862 | 0.0411740275709601 | 0.68261202897898 | 0.629688696406604 | 0.739983399362024 | 1.80083388272607e-20 | 5.24222743261558e-17 |
| ERBB2 | 0.374891438053017 | 0.0405272011566349 | 1.45483346649112 | 1.34374181778627 | 1.57510943486854 | 2.23725554787493e-20 | 6.51265089986391e-17 |
| SEMA3F | 0.37757270816498 | 0.0408304511352794 | 1.45873950221101 | 1.34654900092916 | 1.58027738600118 | 2.3016749549295e-20 | 6.70017579379978e-17 |
| MSR1 | 0.38317083057187 | 0.0414548229341885 | 1.46692860491734 | 1.35245218440114 | 1.59109472167962 | 2.39470164774033e-20 | 6.9709764965721e-17 |
| C3 | 0.333803410333425 | 0.0362048736772858 | 1.39626862460823 | 1.30062101978168 | 1.49895014951597 | 2.9752334303868e-20 | 8.66090451585597e-17 |
| KITLG | -0.355769413 | 0.0386511657512161 | 0.700634158410664 | 0.649517370804866 | 0.755773819141315 | 3.42872340088742e-20 | 9.98101381998327e-17 |
| TACSTD2 | -0.341727719 | 0.0371685365163249 | 0.710541645510069 | 0.660618969838003 | 0.764236955120983 | 3.78480249656198e-20 | 1.10175600674919e-16 |
| SNCG | 0.37819513175173 | 0.041189301275789 | 1.4596477387087 | 1.34644003897242 | 1.58237385954702 | 4.23638338585513e-20 | 1.23321120362243e-16 |
| SIGLEC1 | 0.363722551538402 | 0.0396181742739292 | 1.43867500061436 | 1.33118687293738 | 1.55484237372741 | 4.28300196859164e-20 | 1.24678187305703e-16 |
| BAIAP2 | 0.337623988030507 | 0.0367788446426174 | 1.40161338090152 | 1.30413169634041 | 1.50638165994657 | 4.31723839732727e-20 | 1.25674809746197e-16 |
| SCARB2 | 0.424043508077427 | 0.0464360914954265 | 1.52812807825249 | 1.39518743568596 | 1.67373598974215 | 6.73910320177072e-20 | 1.96175294203546e-16 |
| CSF1 | 0.361648085462507 | 0.0397279895765878 | 1.43569361159571 | 1.32814233581234 | 1.55195425279175 | 8.77849805551924e-20 | 2.55542078396165e-16 |
| LILRB4 | 0.356452729605592 | 0.0392015407599874 | 1.42825401479234 | 1.32262408933839 | 1.54231995864437 | 9.64989539473184e-20 | 2.80908454940644e-16 |
| ACAN | -0.355544061 | 0.0391383964249872 | 0.700792065580306 | 0.649043642768247 | 0.756666403950392 | 1.04389494995562e-19 | 3.03877819932082e-16 |
| ACE2 | 0.400680364351406 | 0.0441894948536884 | 1.49284002734199 | 1.3689841308245 | 1.62790151986074 | 1.21978388589255e-19 | 3.55079089183322e-16 |
| CA5A | 0.339718049171862 | 0.0375627819318237 | 1.40455152026574 | 1.30485900994985 | 1.51186063631245 | 1.51032093719404e-19 | 4.39654424817185e-16 |
| CNTN3 | 0.385379693568041 | 0.04263052993541 | 1.47017243 | 1.35232300065149 | 1.59829195713325 | 1.56681804476397e-19 | 4.56100732830793e-16 |
| LGALS3BP | 0.345821710399938 | 0.0383944497384419 | 1.41315064329328 | 1.31070949378736 | 1.52359828787827 | 2.11624240372111e-19 | 6.16038163723216e-16 |
| SSC5D | 0.354583519902072 | 0.0394144449636498 | 1.42558680209531 | 1.31960336155468 | 1.54008226222917 | 2.33487898068345e-19 | 6.79683271276953e-16 |
| CTSO | 0.34311289409467 | 0.0381503481056844 | 1.40932785773838 | 1.30778937503456 | 1.51874992144279 | 2.39038171181539e-19 | 6.95840116309459e-16 |
| MVK | 0.348195301600248 | 0.0387185086081154 | 1.41650886917595 | 1.31299005984991 | 1.5281893121746 | 2.40586180692163e-19 | 7.00346371994887e-16 |
| SETMAR | 0.335747747905048 | 0.0375830172657845 | 1.39898608312738 | 1.29963705115114 | 1.50592972018654 | 4.12752931272514e-19 | 1.20152378293429e-15 |
| HAO1 | 0.338721720531835 | 0.0379784502390804 | 1.40315282225685 | 1.30249799860329 | 1.51158607899484 | 4.71421691732623e-19 | 1.37230854463367e-15 |
| RNASE4 | 0.401426665455379 | 0.0451670879516122 | 1.49395455133597 | 1.36738365498115 | 1.63224139277007 | 6.24473100397099e-19 | 1.81784119525595e-15 |
| B4GAT1 | -0.335554052 | 0.0377944910952356 | 0.714941861430565 | 0.663895013088504 | 0.769913698926462 | 6.7837930677717e-19 | 1.97476216202834e-15 |
| CCL22 | 0.342350827306447 | 0.0385798073859616 | 1.40825426491096 | 1.30569361435672 | 1.51887093023501 | 7.06695318742078e-19 | 2.05719007285819e-15 |
| CLUL1 | -0.349626223 | 0.0395267891147447 | 0.704951535418909 | 0.652399138148119 | 0.761737160935135 | 9.12844974622431e-19 | 2.6572917211259e-15 |
| GH1 | -0.343770351 | 0.0389905615831969 | 0.709091751611153 | 0.65692077639828 | 0.76540601282205 | 1.17821377169636e-18 | 3.4297802894081e-15 |
| CHCHD10 | 0.388514524623395 | 0.044098349368229 | 1.47478840405531 | 1.35267181644911 | 1.60792944030252 | 1.24941807245137e-18 | 3.63705600890595e-15 |
| RBFOX3 | 0.375057737854085 | 0.0427504651575416 | 1.45507542512546 | 1.3381215821434 | 1.58225121024701 | 1.73682404470179e-18 | 5.05589479412691e-15 |
| MFAP5 | 0.344893438726497 | 0.0393240441253673 | 1.41183946424015 | 1.30710963261929 | 1.5249605871174 | 1.77797927868575e-18 | 5.17569768025421e-15 |
| PTPRR | -0.349511887 | 0.0399327967695318 | 0.705032141197694 | 0.651954719213637 | 0.762430741695301 | 2.08673671472496e-18 | 6.07449057656436e-15 |
| PRRT3 | -0.368811281 | 0.0422085125151396 | 0.691555907660005 | 0.636646981726683 | 0.751200566634854 | 2.37607098307922e-18 | 6.91674263174361e-15 |
| CSTB | 0.336252033309666 | 0.0385087380004768 | 1.39969174930399 | 1.29793547613759 | 1.50942556782537 | 2.50568585683538e-18 | 7.2940515292478e-15 |
| NHLRC3 | 0.367938840601705 | 0.0421729134278843 | 1.44475367600628 | 1.33013432088798 | 1.56924992578209 | 2.67288863305822e-18 | 7.78077881083247e-15 |
| PAG1 | 0.324647935032967 | 0.0373403159122029 | 1.38354346304206 | 1.28590264066368 | 1.4885983227614 | 3.48972341271174e-18 | 1.01585848544039e-14 |
| NOS3 | 0.323507272754623 | 0.0373853281432838 | 1.3819662069326 | 1.28432338315077 | 1.48703248898139 | 5.00217486338368e-18 | 1.45613310273099e-14 |
| GDF2 | -0.340465612 | 0.0395435521636374 | 0.711438991428616 | 0.658381338468835 | 0.768772455947923 | 7.31310825042887e-18 | 2.12884581169984e-14 |
| FOLR2 | 0.334727359854488 | 0.0389106873361242 | 1.39755930250401 | 1.29493747570324 | 1.50831375310594 | 7.80300967699631e-18 | 2.27145611697363e-14 |
| STC1 | 0.333519611026209 | 0.0388520785474257 | 1.39587242076373 | 1.29352304316956 | 1.50632014275866 | 9.13561492455424e-18 | 2.65937750453774e-14 |
| SERPIND1 | 0.348214698169349 | 0.040621980034641 | 1.41653634485458 | 1.3081260505338 | 1.53393108827331 | 1.01636018486285e-17 | 2.95862449813576e-14 |
| NPC2 | 0.375876867906601 | 0.0438771141943568 | 1.4562678094271 | 1.33626408512275 | 1.58704851562241 | 1.06602599288955e-17 | 3.10320166530147e-14 |
| CTSB | -0.337662107 | 0.0395284061173167 | 0.713436312589889 | 0.660249303571952 | 0.77090785157699 | 1.31616558760884e-17 | 3.83135802552932e-14 |
| CA6 | -0.335329705 | 0.0392674961134328 | 0.7151022746754 | 0.662129583060765 | 0.772312967624951 | 1.34657720721501e-17 | 3.9198862502029e-14 |
| CFD | 0.380186671616069 | 0.0446503515853693 | 1.46255758194087 | 1.3400031738553 | 1.59632060746426 | 1.66947162049913e-17 | 4.85983188727298e-14 |
| DPT | 0.356375706317859 | 0.0418945830067283 | 1.42814401020891 | 1.31555985940921 | 1.5503629875204 | 1.79283411842015e-17 | 5.21894011872105e-14 |
| PSPN | 0.431638909946366 | 0.0507838700708574 | 1.53977901587878 | 1.39389574980157 | 1.70093022959439 | 1.90363643500957e-17 | 5.54148566231285e-14 |
| DPY30 | 0.30508462002459 | 0.0359110557194499 | 1.35673980550456 | 1.26452802629227 | 1.45567584234398 | 1.96976543720379e-17 | 5.73398718770022e-14 |
| PDZK1 | 0.317751090208092 | 0.0374359984969704 | 1.37403420809033 | 1.27682500693547 | 1.47864428934844 | 2.10497419268872e-17 | 6.12757987491687e-14 |
| TGFBR2 | 0.374511353382962 | 0.0441673713044707 | 1.4542806116655 | 1.3336816897317 | 1.58578475939911 | 2.26422294518634e-17 | 6.59115299343744e-14 |
| PBLD | 0.303245404348215 | 0.0357641509784549 | 1.3542467617109 | 1.26256790698334 | 1.45258269393717 | 2.27073927992902e-17 | 6.61012204387337e-14 |
| SCG3 | -0.317351497 | 0.0375102523114789 | 0.728074794056617 | 0.676467014574087 | 0.783619739499551 | 2.66476680758044e-17 | 7.75713617686666e-14 |
| GFRA1 | 0.3603137514236 | 0.042790048519613 | 1.43377919426047 | 1.31843477477752 | 1.5592146211716 | 3.748698632455e-17 | 1.09124617190765e-13 |
| NPL | 0.361292924222496 | 0.0431280004318396 | 1.43518379941046 | 1.31885250400378 | 1.56177626522847 | 5.41906094149188e-17 | 1.57748864006829e-13 |
| GLA | 0.336975030810098 | 0.0402502614712807 | 1.4007040888555 | 1.29444821859805 | 1.51568206155162 | 5.6650335103952e-17 | 1.64909125487604e-13 |
| TMPRSS5 | -0.309047397 | 0.0369443146188753 | 0.734145972557218 | 0.68286489227299 | 0.789278106285363 | 6.00017876315093e-17 | 1.74665203795323e-13 |
| SCGB3A2 | -0.347120666 | 0.0415608500772727 | 0.706720046227912 | 0.651433518171547 | 0.766698688059918 | 6.70558882765513e-17 | 1.95199690773041e-13 |
| BMP10 | -0.325356191 | 0.0390718146973922 | 0.722270041463622 | 0.669022927476347 | 0.779755059761096 | 8.28237879568782e-17 | 2.41100046742473e-13 |
| IL12A_IL12B | 0.321943601292278 | 0.0387124943901292 | 1.37980695443361 | 1.27898540629794 | 1.48857619651358 | 9.07739949403437e-17 | 2.64243099271341e-13 |
| BCHE | 0.345717685331883 | 0.0415868772811171 | 1.41300364784718 | 1.30239829332933 | 1.53300209241336 | 9.31995771223317e-17 | 2.71303969003108e-13 |
| VNN1 | 0.333148403603689 | 0.0402667878728101 | 1.39535435872044 | 1.28946254448097 | 1.5099421031914 | 1.30052061712838e-16 | 3.78581551646071e-13 |
| ICAM1 | 0.317398138558076 | 0.0383655482357361 | 1.3735493260244 | 1.27405109717203 | 1.48081796343161 | 1.30630898932539e-16 | 3.80266546792621e-13 |
| NXPH3 | -0.32499189 | 0.039526627158095 | 0.722533213046028 | 0.668670357355945 | 0.780734839239656 | 1.99969945796168e-16 | 5.82112512212646e-13 |
| SIGLEC10 | 0.306121662715282 | 0.0375387423230931 | 1.35814753241332 | 1.26180814470232 | 1.46184245801928 | 3.49702158241401e-16 | 1.01798298264072e-12 |
| NPTXR | -0.305548127 | 0.0375108179647894 | 0.736719447916089 | 0.684498154653749 | 0.792924774519425 | 3.77405116794898e-16 | 1.09862629498995e-12 |
| LILRA5 | 0.308705673603454 | 0.0380203217560857 | 1.36166153858464 | 1.26387935346551 | 1.46700880948547 | 4.68141550101482e-16 | 1.36276005234541e-12 |
| FGFR2 | 0.338001013661933 | 0.0416621554218621 | 1.40214192470249 | 1.29219611939116 | 1.52144240917139 | 4.94246423299844e-16 | 1.43875133822585e-12 |
| AGXT | 0.292758299357468 | 0.0361433709271353 | 1.3401188436986 | 1.24846811571797 | 1.43849770180416 | 5.49967623877569e-16 | 1.6009557531076e-12 |
| KIAA0319 | -0.340438406 | 0.0420667918781614 | 0.711458346649231 | 0.655151142370063 | 0.772604894171038 | 5.83054572524119e-16 | 1.69727186061771e-12 |
| EFNA4 | 0.345173151549539 | 0.0426741417352208 | 1.41223442907816 | 1.29891829035195 | 1.53543613750587 | 6.03650048170658e-16 | 1.75722529022479e-12 |
| COL4A1 | -0.316766113 | 0.0391973440031062 | 0.728501121887516 | 0.674628636539278 | 0.78667559579717 | 6.40716779385529e-16 | 1.86512654479127e-12 |
| LMNB2 | 0.338226955302686 | 0.0419812987868768 | 1.40245876274164 | 1.2916798876443 | 1.52273841220669 | 7.84393522641504e-16 | 2.28336954440942e-12 |
| AGRN | 0.34256329452247 | 0.0425786436719454 | 1.40855350456226 | 1.29577523476677 | 1.53114747217077 | 8.59464562236011e-16 | 2.50190134066903e-12 |
| CD22 | 0.312127781550666 | 0.0388177195922709 | 1.36632927354845 | 1.26623135406036 | 1.47434011783794 | 8.92113954091042e-16 | 2.59694372035902e-12 |
| FBP1 | 0.289390721860198 | 0.0360181407617148 | 1.33561347997542 | 1.24457631898992 | 1.43330974619526 | 9.38981154865223e-16 | 2.73337414181267e-12 |
| CD5 | 0.30922630410684 | 0.0386682921173092 | 1.36237064569229 | 1.26293256794233 | 1.46963806568713 | 1.27595095614856e-15 | 3.71429323334846e-12 |
| GAL | -0.304556302 | 0.0381350659231649 | 0.737450507117593 | 0.684339574077173 | 0.794683328348138 | 1.39101546814676e-15 | 4.04924602777521e-12 |
| IL7R | -0.290321216 | 0.0364049038878908 | 0.74802325173699 | 0.69650881625605 | 0.803347742454825 | 1.52648525093935e-15 | 4.44359856548445e-12 |
| IGFBP4 | 0.38028704054824 | 0.0477228029991763 | 1.4627043846507 | 1.33209161085302 | 1.60612385773253 | 1.60397319675088e-15 | 4.66916597574181e-12 |
| COL15A1 | 0.350845413441497 | 0.0440709139410914 | 1.42026775463691 | 1.30273567935152 | 1.54840350719915 | 1.70752458281011e-15 | 4.97060406056022e-12 |
| SERPINA6 | -0.341014065 | 0.0428583362874113 | 0.711048907199599 | 0.653759060666736 | 0.773359145361775 | 1.76583852872862e-15 | 5.14035595712902e-12 |
| ESM1 | -0.31026909 | 0.0389985365075383 | 0.733249619477686 | 0.679290626507468 | 0.791494808677828 | 1.77810662898815e-15 | 5.17606839698451e-12 |
| PALM | 0.352845336499216 | 0.0444986305802444 | 1.42311102307891 | 1.30424981432903 | 1.55280450244924 | 2.20291079417817e-15 | 6.41267332185266e-12 |
| AMY2A | -0.300334165 | 0.0379006317402319 | 0.740570706296521 | 0.68755090846211 | 0.797679072595907 | 2.29523325361851e-15 | 6.68142400128349e-12 |
| CD34 | -0.293431577 | 0.0370317446715479 | 0.745700244503889 | 0.69349323363925 | 0.801837462400422 | 2.30388162594191e-15 | 6.7065994131169e-12 |
| OPTC | -0.322896048 | 0.0407693617500342 | 0.724049116864276 | 0.668443103368331 | 0.784280847524973 | 2.37383975487949e-15 | 6.9102475264542e-12 |
| RELT | 0.355471640398666 | 0.0448936846804019 | 1.42685345734192 | 1.30666752030028 | 1.55809397348509 | 2.41212484663773e-15 | 7.02169542856244e-12 |
| CD59 | 0.339644837615376 | 0.0429080573759003 | 1.40444869462684 | 1.29116517244799 | 1.5276714226262 | 2.45979708047827e-15 | 7.16046930127224e-12 |
| FGF23 | 0.300094171565925 | 0.0379247283127428 | 1.34998593187934 | 1.25327697889219 | 1.45415741848468 | 2.51483244674744e-15 | 7.32067725248179e-12 |
| GZMA | 0.281386385502101 | 0.0356115572606769 | 1.32496545248509 | 1.23563836746937 | 1.42075019398628 | 2.75463436091192e-15 | 8.01874062461461e-12 |
| AMY2B | -0.299967946 | 0.0379658973754611 | 0.740841967390118 | 0.687714770572472 | 0.798073335242729 | 2.76710286735214e-15 | 8.05503644686207e-12 |
| CLEC4A | -0.285774512 | 0.0363321194554291 | 0.751432035885018 | 0.699782668333077 | 0.806893525813283 | 3.67284635377881e-15 | 1.06916557358501e-11 |
| INHBB | 0.338720641272395 | 0.0432126323012185 | 1.40315130789174 | 1.2892025925875 | 1.52717160526862 | 4.56092736508247e-15 | 1.32768595597551e-11 |
| VWA1 | 0.29459870338076 | 0.0376827364259714 | 1.34258747475271 | 1.24699984199009 | 1.44550229010949 | 5.37249844291756e-15 | 1.5639342967333e-11 |
| OSM | 0.295209433682339 | 0.037763675214724 | 1.3434076840439 | 1.24756372594598 | 1.44661484460821 | 5.39745592983816e-15 | 1.57119942117589e-11 |
| PLAUR | 0.338210141037132 | 0.0435117672957008 | 1.40243518162582 | 1.28778936412383 | 1.52728737591339 | 7.67437669437453e-15 | 2.23401105573242e-11 |
| CRHBP | 0.306501583746351 | 0.0394349087530049 | 1.3586636192541 | 1.25760505543345 | 1.46784304206569 | 7.70482948748433e-15 | 2.24287586380669e-11 |
| CRH | -0.280619042 | 0.0361409988102496 | 0.75531602456055 | 0.70366323306268 | 0.810760417984117 | 8.19275680675931e-15 | 2.38491150644763e-11 |
| OCLN | 0.330930861063539 | 0.0426935047352621 | 1.39226352936078 | 1.28050123584314 | 1.51378044856928 | 9.09448069973707e-15 | 2.64740333169346e-11 |
| DKK3 | -0.301708558 | 0.0389702986475375 | 0.739553570291003 | 0.685168597290934 | 0.798255327948034 | 9.78549915504044e-15 | 2.84855880403227e-11 |
| MZB1 | 0.298839673209586 | 0.0386101962834887 | 1.34829343858372 | 1.25002517172812 | 1.45428687169133 | 9.9482574179137e-15 | 2.89593773435468e-11 |
| CCN5 | 0.312862175044787 | 0.0404554825419437 | 1.36733306542177 | 1.26310052098438 | 1.48016700233695 | 1.04635451762383e-14 | 3.04593800080298e-11 |
| TNFRSF6B | 0.302236825397473 | 0.0392526329230513 | 1.35288158549266 | 1.25270055494658 | 1.46107429835311 | 1.36295597756106e-14 | 3.96756485068026e-11 |
| ACAA1 | 0.282944652779873 | 0.0367731999899191 | 1.32703171226827 | 1.23475081538106 | 1.42620935611384 | 1.42252131958045e-14 | 4.14095956129869e-11 |
| IL10RB | 0.315788326708683 | 0.0411315663797884 | 1.37133994886154 | 1.26512439916365 | 1.48647299553055 | 1.62200909067939e-14 | 4.72166846296769e-11 |
| HSPB6 | 0.321873288271806 | 0.0420674020306069 | 1.37970993944973 | 1.27051353917284 | 1.49829140605278 | 1.98848158016164e-14 | 5.78846987985053e-11 |
| SHISA5 | 0.371070078689229 | 0.0485442225383315 | 1.44928463379545 | 1.31774692406004 | 1.59395245885613 | 2.10641429325001e-14 | 6.13177200765078e-11 |
| IL12B | 0.293264413272254 | 0.0384311642394494 | 1.34079726815841 | 1.24351162317517 | 1.44569401748793 | 2.3311848072802e-14 | 6.78607897399267e-11 |
| BMPER | 0.316425814816295 | 0.0414820644755184 | 1.37221444047982 | 1.26506179203411 | 1.48844308042352 | 2.38395617893203e-14 | 6.93969643687115e-11 |
| CTSZ | 0.300075412787322 | 0.0393980203183732 | 1.34996060802965 | 1.24963972898943 | 1.45833523131146 | 2.60626557798021e-14 | 7.5868390975004e-11 |
| SUOX | 0.281417419760748 | 0.0369723491112848 | 1.3250065724437 | 1.23238536874106 | 1.42458881900916 | 2.70797712318048e-14 | 7.88292140557838e-11 |
| EZR | 0.278318394708451 | 0.0365842547636629 | 1.32090669996624 | 1.22950697460143 | 1.41910094538611 | 2.79231384027347e-14 | 8.12842558903607e-11 |
| SULT2A1 | 0.287375400513442 | 0.0380865530639834 | 1.33292450010759 | 1.23704535308322 | 1.43623491132224 | 4.51162827325036e-14 | 1.31333499034318e-10 |
| MATN3 | -0.291437176 | 0.0386736749779549 | 0.747188953752198 | 0.692645067810995 | 0.806028020056077 | 4.85340770366915e-14 | 1.41282698253809e-10 |
| CD83 | 0.304800231730446 | 0.0404761050220705 | 1.3563540194448 | 1.25290777003106 | 1.4683413017851 | 5.05949744046601e-14 | 1.47281970491966e-10 |
| CD4 | 0.319395759784688 | 0.042425888260214 | 1.37629589970746 | 1.26647951875198 | 1.4956344540164 | 5.13964104636443e-14 | 1.49614950859668e-10 |
| FGA | 0.295173041594094 | 0.039316919107247 | 1.34335879552249 | 1.24372620810251 | 1.45097276374103 | 6.02523041445962e-14 | 1.75394457364919e-10 |
| CTHRC1 | 0.326695845830032 | 0.0435905305854411 | 1.38637973986793 | 1.27284990471851 | 1.51003568919726 | 6.64746258882284e-14 | 1.93507635960633e-10 |
| ARSA | 0.284181477200939 | 0.0379248947952149 | 1.32867403291931 | 1.23349139811295 | 1.43120145665776 | 6.71784948143686e-14 | 1.95556598404627e-10 |
| IMMT | 0.2929324235409 | 0.0391268012398881 | 1.34035221111483 | 1.24140511223638 | 1.44718596059585 | 7.06021366222334e-14 | 2.05522819707322e-10 |
| AIFM1 | 0.273852523819644 | 0.0366089600866169 | 1.31502085368509 | 1.22396912861204 | 1.41284596580277 | 7.40527141612869e-14 | 2.15567450923506e-10 |
| DSG2 | -0.298509215 | 0.0399552673385065 | 0.741923445076709 | 0.686038494175537 | 0.802360804864178 | 7.95360064941903e-14 | 2.31529314904588e-10 |
| EPHA1 | 0.319461712651314 | 0.0428324575751341 | 1.37638667336073 | 1.26555415797951 | 1.49692548727393 | 8.75777274144977e-14 | 2.54938764503603e-10 |
| NFATC3 | 0.265444915489371 | 0.0356033426076769 | 1.3040110214349 | 1.2161162313628 | 1.39825840669698 | 8.94476823465468e-14 | 2.60382203310798e-10 |
| TNFRSF13B | 0.28165285576156 | 0.0378001070736998 | 1.32531856341767 | 1.23067727250492 | 1.42723793945131 | 9.25562919450323e-14 | 2.69431365851989e-10 |
| CD74 | 0.292032040115753 | 0.0391996133498198 | 1.33914592334233 | 1.24011088369056 | 1.44608988404932 | 9.34319510241401e-14 | 2.71980409431272e-10 |
| LBP | 0.27293036426454 | 0.0367050589191092 | 1.31380875360044 | 1.22261064910095 | 1.41180959147249 | 1.03960838208938e-13 | 3.02630000026218e-10 |
| CBS | 0.27363334140253 | 0.0369354661565159 | 1.31473265582093 | 1.22291802631791 | 1.41344057335255 | 1.27815709276799e-13 | 3.72071529704763e-10 |
| SFRP4 | 0.289526181178878 | 0.0391818487073023 | 1.33579441352173 | 1.2370503027646 | 1.44242049915687 | 1.47610982733331e-13 | 4.29695570736725e-10 |
| APOA2 | -0.297742291 | 0.0403457035101767 | 0.7424926623447 | 0.686039639362695 | 0.803591107574853 | 1.58554996633809e-13 | 4.61553595201019e-10 |
| TIMD4 | 0.273710168986662 | 0.0370898344599372 | 1.31483366743485 | 1.22264200293995 | 1.41397691954239 | 1.58700654598535e-13 | 4.61977605536336e-10 |
| SPON2 | 0.295718845816645 | 0.0400797756485205 | 1.3440922065567 | 1.24254598149775 | 1.45393722777875 | 1.6037635656698e-13 | 4.66855573966479e-10 |
| CCL3 | 0.290394591354882 | 0.0394379762842261 | 1.3369549348148 | 1.23750364119701 | 1.44439857647344 | 1.79386463211719e-13 | 5.22193994409315e-10 |
| SIGLEC7 | 0.295353070296331 | 0.0401319453723191 | 1.34360066043375 | 1.24196457103361 | 1.45355413255919 | 1.84530826393282e-13 | 5.37169235630842e-10 |
| STAB2 | 0.287727122394491 | 0.0393237842290712 | 1.33339340127663 | 1.23448330412063 | 1.44022843940733 | 2.53816462084387e-13 | 7.3885972112765e-10 |
| PTPRN2 | -0.283043414 | 0.0387130299873399 | 0.753487075107767 | 0.698429557945144 | 0.812884801188568 | 2.64527468953045e-13 | 7.70039462122313e-10 |
| CR1 | 0.288051307759826 | 0.0394839962768177 | 1.33382573797839 | 1.23449585857321 | 1.44114788797251 | 2.97786443445535e-13 | 8.66856336869953e-10 |
| CD300C | 0.291881401082346 | 0.0401528660150208 | 1.33894421088812 | 1.23760960804117 | 1.44857601962893 | 3.61476873866823e-13 | 1.05225917982632e-09 |
| OGN | 0.310317431175087 | 0.0427041942199747 | 1.36385797646666 | 1.25434962416948 | 1.48292672483825 | 3.68448237228424e-13 | 1.07255281857194e-09 |
| PTP4A3 | 0.25618514391338 | 0.0354167283495599 | 1.29199191023576 | 1.20534804148671 | 1.38486398837615 | 4.7087486067415e-13 | 1.37071671942245e-09 |
| AHNAK | 0.282640990403797 | 0.039081586549983 | 1.32662880384255 | 1.2288036831548 | 1.43224178712281 | 4.75667090001327e-13 | 1.38466689899386e-09 |
| C1QTNF1 | 0.272733796022057 | 0.0377489566425671 | 1.3135505259033 | 1.21987188508139 | 1.41442310885434 | 5.0133786444043e-13 | 1.45939452338609e-09 |
| TGFA | 0.274373255712013 | 0.0380352734460127 | 1.31570580530533 | 1.22118795643752 | 1.41753917321959 | 5.44705484756246e-13 | 1.58563766612543e-09 |
| CSF1R | 0.279011532609835 | 0.0387181156026379 | 1.32182258784581 | 1.22522441854326 | 1.4260366731972 | 5.75234506235067e-13 | 1.67450764765028e-09 |
| UMOD | -0.274331009 | 0.0381298969537952 | 0.760080440306521 | 0.705346853185392 | 0.819061250684714 | 6.26242510434228e-13 | 1.82299194787404e-09 |
| MPO | 0.263026041520675 | 0.0366059536205018 | 1.30086059489871 | 1.21079645751806 | 1.39762408194441 | 6.7042572857277e-13 | 1.95160929587533e-09 |
| VSNL1 | 0.298150384280383 | 0.0415674784097146 | 1.34736439506967 | 1.2419442889624 | 1.46173288869354 | 7.35415115922885e-13 | 2.14079340245152e-09 |
| NCAM1 | -0.277019814 | 0.0387218784874948 | 0.758039477296887 | 0.702637128813982 | 0.81781025450573 | 8.42296323817619e-13 | 2.45192459863309e-09 |
| RET | 0.27926191321472 | 0.0390598323651995 | 1.32215358802119 | 1.22471068645284 | 1.4273494382419 | 8.70354176883837e-13 | 2.53360100890885e-09 |
| APLP1 | -0.265194973 | 0.0371301381377456 | 0.767056380350738 | 0.713216653096916 | 0.824960393285747 | 9.17750439331965e-13 | 2.67157152889535e-09 |
| THBS2 | 0.289442070741163 | 0.0405322529918677 | 1.33568206399386 | 1.23367664724456 | 1.4461217046295 | 9.26335281114314e-13 | 2.69656200332377e-09 |
| AGER | -0.278844706 | 0.039070058831375 | 0.756657398124183 | 0.700877595207486 | 0.816876473225782 | 9.53597280648792e-13 | 2.77592168396863e-09 |
| SKAP1 | 0.261517309767243 | 0.0367026332872279 | 1.29889942502404 | 1.20874199899464 | 1.39578149657334 | 1.03853476887612e-12 | 3.02317471219838e-09 |
| PODXL2 | -0.263290422 | 0.0371869368669941 | 0.768518669936964 | 0.714496758357776 | 0.826625088403737 | 1.43961314913187e-12 | 4.19071387712288e-09 |
| C2 | 0.288876919418813 | 0.0408017534156614 | 1.33492741477475 | 1.23232851669118 | 1.44606829963001 | 1.44141581400042e-12 | 4.19596143455521e-09 |
| MARCO | 0.261059266967015 | 0.036966835135318 | 1.29830460973002 | 1.20756298913817 | 1.39586495678309 | 1.64139695114436e-12 | 4.77810652478122e-09 |
| EPS8L2 | 0.268306656303077 | 0.0381785575820298 | 1.30774810773223 | 1.21346109248606 | 1.40936130862957 | 2.09996969058539e-12 | 6.11301176929406e-09 |
| CLSTN3 | 0.261413893033026 | 0.0372178156569539 | 1.29876510403307 | 1.20739720724502 | 1.39704712362459 | 2.15772641608094e-12 | 6.2811415972116e-09 |
| LILRA2 | 0.271568659086838 | 0.0386721597925616 | 1.31202095092448 | 1.21624862731103 | 1.41533477367252 | 2.18198772350454e-12 | 6.35176626312172e-09 |
| IL13RA1 | 0.259995974391303 | 0.0370626853014658 | 1.29692486574324 | 1.20605308072001 | 1.39464351467763 | 2.29894069865606e-12 | 6.6922163737878e-09 |
| ROBO1 | 0.267650286739676 | 0.0382014466111651 | 1.30689002331877 | 1.21261047293954 | 1.40849973768559 | 2.44726211643607e-12 | 7.1239800209454e-09 |
| CD80 | 0.272139932734065 | 0.038843444808587 | 1.31277068805049 | 1.21653515452081 | 1.41661905371193 | 2.45103545600927e-12 | 7.13496421244297e-09 |
| FABP5 | 0.257363958579138 | 0.036761221834658 | 1.293515827 | 1.20359385925984 | 1.39015597541367 | 2.54208847457405e-12 | 7.40001954948507e-09 |
| PILRA | 0.273115608335703 | 0.0393093777678693 | 1.31405215142599 | 1.21661112586543 | 1.41929744020627 | 3.70898519318108e-12 | 1.07968558973501e-08 |
| THOP1 | 0.269782441167189 | 0.0388888818389259 | 1.30967948739559 | 1.2135624805713 | 1.41340918754945 | 3.9976627283129e-12 | 1.16371962021188e-08 |
| TCTN3 | 0.270138920899595 | 0.0389505149320015 | 1.31014644481428 | 1.21384852531139 | 1.41408394133787 | 4.04961569141101e-12 | 1.17884312776975e-08 |
| IL17RB | -0.260526476 | 0.0375888334683121 | 0.770645752273155 | 0.715910163491119 | 0.829566202273959 | 4.18011924644952e-12 | 1.21683271264146e-08 |
| PGF | 0.315147824532089 | 0.0455226357467334 | 1.37046188387073 | 1.25347971834891 | 1.49836151925653 | 4.42547151257908e-12 | 1.28825475731177e-08 |
| MTUS1 | 0.260707326650754 | 0.0379042851714064 | 1.29784776439093 | 1.20492211224781 | 1.3979400016091 | 6.06800940631597e-12 | 1.76639753817858e-08 |
| MEP1A | 0.26119443455515 | 0.0379824234251763 | 1.29848011029351 | 1.20532457153199 | 1.39883533170227 | 6.1246957877022e-12 | 1.78289894380011e-08 |
| LILRB1 | 0.253103927507865 | 0.0368224602302507 | 1.28801713028942 | 1.19833357653711 | 1.38441262132791 | 6.25888930038207e-12 | 1.82196267534122e-08 |
| ORM1 | 0.262709396693518 | 0.0382303836608469 | 1.30044874932831 | 1.20656544068819 | 1.40163715336067 | 6.34218452994339e-12 | 1.84620991666652e-08 |
| ADAM8 | 0.25540003752108 | 0.0372124460976499 | 1.29097795721082 | 1.20017051576457 | 1.38865608187558 | 6.72895292711483e-12 | 1.95879819708313e-08 |
| ITGB6 | -0.266436079 | 0.0388324673185132 | 0.766104972672038 | 0.70995924320353 | 0.826690876654405 | 6.82998254157691e-12 | 1.98820791785304e-08 |
| ASAH2 | 0.278188301633979 | 0.0405820652893315 | 1.32073487032972 | 1.2197518710407 | 1.43007823076063 | 7.13341068870923e-12 | 2.07653585148326e-08 |
| GDF15 | 0.364008897499324 | 0.053111915818734 | 1.43908701837686 | 1.2968127749114 | 1.5969702693608 | 7.20041109722112e-12 | 2.09603967040107e-08 |
| ECHDC3 | 0.265545046494887 | 0.0387699347159635 | 1.30414159990705 | 1.20871277913089 | 1.40710460083912 | 7.42372099471213e-12 | 2.1610451815607e-08 |
| MAD1L1 | 0.254209973241733 | 0.0371966832978734 | 1.28944252427168 | 1.19878012108484 | 1.38696162386768 | 8.24577223883181e-12 | 2.40034429872394e-08 |
| CCL7 | 0.23942382354631 | 0.0350530531890311 | 1.2705168974679 | 1.18615838749744 | 1.36087490824655 | 8.4721158731786e-12 | 2.46623293068229e-08 |
| SIGLEC8 | 0.274681136377059 | 0.040219000332713 | 1.31611094804828 | 1.21634674584044 | 1.42405776436366 | 8.51303018103503e-12 | 2.4781430856993e-08 |
| KRT8 | 0.346182514385094 | 0.0507103435561644 | 1.41366060566971 | 1.27991061186819 | 1.56138740431683 | 8.69114796629012e-12 | 2.52999317298705e-08 |
| KIT | -0.26096587 | 0.0382550941645816 | 0.770307209888185 | 0.714661800571079 | 0.830285314160575 | 8.99514885142411e-12 | 2.61848783064956e-08 |
| VCAN | -0.258868687 | 0.0380493172589361 | 0.771924380176062 | 0.716451052535398 | 0.831692893187224 | 1.02104565830037e-11 | 2.97226391131238e-08 |
| CILP | 0.29411972484058 | 0.0432399795542731 | 1.3419445581479 | 1.23290030455326 | 1.46063326490563 | 1.0315367326147e-11 | 3.00280342864138e-08 |
| VEGFB | 0.270805944645547 | 0.039817966318199 | 1.31102063512408 | 1.21259504775945 | 1.41743536632199 | 1.03823791751867e-11 | 3.02231057789684e-08 |
| ADAM12 | 0.259149943794214 | 0.0381425043982635 | 1.29582809164234 | 1.2024854644793 | 1.39641641640679 | 1.08872821988895e-11 | 3.16928784809673e-08 |
| LCAT | 0.274484176631781 | 0.0404912876122311 | 1.31585175269756 | 1.21545835541987 | 1.42453735856637 | 1.21140113937807e-11 | 3.52638871672955e-08 |
| ASS1 | 0.26915786843851 | 0.039834408226536 | 1.30886175269843 | 1.21055923232601 | 1.41514685273613 | 1.40956972286536e-11 | 4.10325746326107e-08 |
| PTPRZ1 | -0.275988289 | 0.0408533095718372 | 0.758821817272737 | 0.700430049773611 | 0.822081449182841 | 1.42253262813875e-11 | 4.1409924805119e-08 |
| CD28 | 0.242323579716965 | 0.0358853048803163 | 1.27420643347334 | 1.18766403503298 | 1.36705498121762 | 1.45094236400787e-11 | 4.2236932216269e-08 |
| FETUB | 0.255612023113768 | 0.0379846183068156 | 1.29125165494719 | 1.19860954351948 | 1.39105419727268 | 1.70415520331277e-11 | 4.96079579684349e-08 |
| TNFRSF10B | 0.32931056844432 | 0.0489405882924756 | 1.39000948164173 | 1.26287013494168 | 1.529948572 | 1.71088701705634e-11 | 4.98039210665101e-08 |
| VEGFD | -0.252735969 | 0.0375773666254118 | 0.776672920861123 | 0.721525464832543 | 0.836035393621137 | 1.74690437519806e-11 | 5.08523863620154e-08 |
| CRISP2 | -0.280135253 | 0.0416978955136866 | 0.75568152664639 | 0.696377676053526 | 0.82003572106284 | 1.83969407493715e-11 | 5.35534945214205e-08 |
| CDA | 0.253452573590509 | 0.0379354609843959 | 1.28846627070725 | 1.19613923988567 | 1.38791979678631 | 2.37071490887833e-11 | 6.90115109974482e-08 |
| TREH | 0.252206864734447 | 0.0378528635285551 | 1.286862216 | 1.19484354511062 | 1.38596753538525 | 2.6862024179873e-11 | 7.81953523876102e-08 |
| PLXNB2 | 0.261334224403476 | 0.0392690481441707 | 1.2986616373187 | 1.20245691164135 | 1.40256339492547 | 2.8336338495951e-11 | 8.24870813617135e-08 |
| RBKS | 0.256856885362336 | 0.0386378877071302 | 1.29286008631587 | 1.19856693877029 | 1.39457142419062 | 2.97509550582575e-11 | 8.66050301745877e-08 |
| SFRP1 | 0.261645203838029 | 0.0395238769694797 | 1.29906555718248 | 1.20223028783281 | 1.40370055465822 | 3.59374848078812e-11 | 1.04614018275742e-07 |
| ANGPTL4 | 0.253964465046908 | 0.0385395350642796 | 1.28912599442214 | 1.19533559228368 | 1.39027553452159 | 4.40678381764681e-11 | 1.28281476931699e-07 |
| CFP | 0.265130948564927 | 0.0402355969327629 | 1.30360166936992 | 1.20474650868583 | 1.4105683644917 | 4.41422339668239e-11 | 1.28498043077424e-07 |
| FGF5 | -0.257298332 | 0.0392068683964925 | 0.773137527664675 | 0.715950825326159 | 0.83489202824948 | 5.288354993438e-11 | 1.5394401385898e-07 |
| DMP1 | -0.257028206 | 0.0391679522523972 | 0.773346400701743 | 0.716198875086747 | 0.83505388835734 | 5.30171894501174e-11 | 1.54333038489292e-07 |
| RETN | 0.258735558544792 | 0.0394974544557413 | 1.29529123083666 | 1.19879939023193 | 1.39954973814071 | 5.72720452814696e-11 | 1.66718923814358e-07 |
| ENAH | 0.223261731700364 | 0.0341376042889863 | 1.25014773421216 | 1.16923773424609 | 1.33665661959116 | 6.14971520504878e-11 | 1.7901820961897e-07 |
| CRIP2 | 0.251873271439484 | 0.0385318588351834 | 1.28643299915208 | 1.19285647284745 | 1.38735036358314 | 6.28684460915454e-11 | 1.83010046572489e-07 |
| RTBDN | -0.249977361 | 0.0382790323945539 | 0.778818414234494 | 0.722524272150368 | 0.83949861026191 | 6.55946346543703e-11 | 1.90945981478872e-07 |
| IL2RA | 0.248174524709193 | 0.03807132220962 | 1.28168359813308 | 1.18952579151518 | 1.38098127627054 | 7.09317915232191e-11 | 2.06482445124091e-07 |
| CCL16 | 0.281492669568501 | 0.043242768824882 | 1.32510628268509 | 1.21742362459942 | 1.44231360795981 | 7.53564972502594e-11 | 2.19362763495505e-07 |
| CCDC80 | 0.277485166810345 | 0.0426467647712446 | 1.31980654205782 | 1.21397185400506 | 1.43486795242565 | 7.68740106319385e-11 | 2.23780244949573e-07 |
| ICOSLG | -0.233053859 | 0.035846813302626 | 0.792110909784486 | 0.738367498086236 | 0.849766132753482 | 7.95849694406072e-11 | 2.31671846041608e-07 |
| APBB1IP | 0.218762170416601 | 0.0338789017846194 | 1.24453525418644 | 1.16457885396499 | 1.32998121478812 | 1.06671923815064e-10 | 3.10521970225651e-07 |
| CD200 | -0.241227757 | 0.0373898979903708 | 0.785662665596321 | 0.730145129278658 | 0.845401550129821 | 1.10615003763998e-10 | 3.22000275956999e-07 |
| DTNB | 0.25372882223846 | 0.0393749316255554 | 1.28882225694055 | 1.19309880016287 | 1.39222569812206 | 1.16428169906023e-10 | 3.38922402596434e-07 |
| ITGBL1 | 0.292402563008895 | 0.0454212220536908 | 1.33964219949935 | 1.2255343681559 | 1.46437445518554 | 1.21396648664597e-10 | 3.53385644262641e-07 |
| ST3GAL1 | -0.239918847 | 0.0372784792822161 | 0.786691701055603 | 0.731261125528163 | 0.846323988661043 | 1.22781081702408e-10 | 3.57415728835708e-07 |
| LTBP2 | -0.297927791 | 0.0464168246873123 | 0.742354942585833 | 0.67779881555236 | 0.813059639728809 | 1.3759631664453e-10 | 4.00542877752227e-07 |
| REN | 0.288009332915093 | 0.044904994817806 | 1.33376975202515 | 1.22139731446838 | 1.45648081123505 | 1.41984584763534e-10 | 4.13317126246646e-07 |
| ENTR1 | 0.231812517547037 | 0.0362061913246553 | 1.26088331317067 | 1.17450687957624 | 1.35361210485703 | 1.52787377613288e-10 | 4.44764056232281e-07 |
| STC2 | 0.251828077568095 | 0.0393974935219531 | 1.28637486157831 | 1.19078051879708 | 1.38964339639369 | 1.63748957939494e-10 | 4.76673216561867e-07 |
| AMOT | 0.254416729065341 | 0.0398470079267052 | 1.28970915158521 | 1.19281563658998 | 1.39447341622534 | 1.71577921161179e-10 | 4.99463328500192e-07 |
| NFASC | 0.265845109475261 | 0.0416648101513902 | 1.30453298323923 | 1.20223470796164 | 1.41553582930942 | 1.76433603439109e-10 | 5.13598219611248e-07 |
| C1RL | 0.246662708740294 | 0.0386901009419279 | 1.27974739236453 | 1.18628919429068 | 1.38056841126591 | 1.82552546214809e-10 | 5.3141046203131e-07 |
| LTBP3 | 0.222359880371638 | 0.0349083269420542 | 1.24902079505913 | 1.16642038569265 | 1.33747057718281 | 1.89245887324375e-10 | 5.50894778001257e-07 |
| TNFRSF14 | 0.25819191637706 | 0.0405583818642485 | 1.294587247 | 1.19565898816913 | 1.40170078375252 | 1.94106940239859e-10 | 5.65045303038231e-07 |
| SLITRK2 | 0.241489326958758 | 0.0379773878445275 | 1.27314386652802 | 1.18181766432413 | 1.371527397 | 2.03380798984176e-10 | 5.92041505842938e-07 |
| ART3 | -0.267814283 | 0.042122338838319 | 0.765049850414042 | 0.7044245381297 | 0.83089279537673 | 2.04383165183606e-10 | 5.94959393849476e-07 |
| CHL1 | -0.235609038 | 0.0372138074073493 | 0.79008950840596 | 0.734512620794428 | 0.849871620474007 | 2.43220224477907e-10 | 7.08014073455186e-07 |
| TIMP1 | 0.243821005917024 | 0.0385318656533502 | 1.27611589285156 | 1.18328982819349 | 1.37622392518534 | 2.48720206344291e-10 | 7.24024520668231e-07 |
| DLK1 | 0.231241245668295 | 0.0369009382547046 | 1.26016321169793 | 1.17223877892681 | 1.35468246628957 | 3.69156019060452e-10 | 1.07461317148497e-06 |
| SORBS1 | 0.229543775973817 | 0.0366425554597179 | 1.25802593732841 | 1.17084342746003 | 1.35170016918854 | 3.74253709757405e-10 | 1.08945254910381e-06 |
| ENO3 | 0.241731182604902 | 0.0385896073003612 | 1.27345182079923 | 1.1806859135836 | 1.37350629938048 | 3.74858642927397e-10 | 1.09121350956165e-06 |
| HJV | 0.225821350253838 | 0.0360571991018135 | 1.25335173430699 | 1.16783223539994 | 1.34513376345736 | 3.77969169725952e-10 | 1.10026825307225e-06 |
| GFER | 0.224761845407993 | 0.0359864619309945 | 1.25202450529789 | 1.16675732041718 | 1.34352305696777 | 4.21816264626667e-10 | 1.22790714632823e-06 |
| RAB6A | -0.239827078 | 0.0384336343284416 | 0.786763898019138 | 0.72967430540615 | 0.848320170574903 | 4.3748356984473e-10 | 1.27351467181801e-06 |
| LSP1 | 0.22962421403203 | 0.0368203474346125 | 1.25812713456199 | 1.17052964341821 | 1.35228005170274 | 4.47926338241296e-10 | 1.30391357062041e-06 |
| CDH15 | 0.24706268700535 | 0.0397572322319356 | 1.28025936588855 | 1.18428416493176 | 1.38401246295461 | 5.1559575967095e-10 | 1.50089925640213e-06 |
| GBP1 | 0.229245422940619 | 0.0369543615750891 | 1.25765065745989 | 1.16977903763696 | 1.35212302949488 | 5.52301520594262e-10 | 1.6077497264499e-06 |
| FN1 | 0.234218091912941 | 0.0377857969294318 | 1.26392011290659 | 1.17369621811854 | 1.36107966196792 | 5.69766950799038e-10 | 1.658591593776e-06 |
| DDT | 0.231846801993997 | 0.0374975644982755 | 1.26092654259879 | 1.17157802052849 | 1.35708908666018 | 6.29015101201866e-10 | 1.83106295959863e-06 |
| MME | 0.230087327500999 | 0.037289206891217 | 1.25870992512234 | 1.16999617783216 | 1.35415030033437 | 6.81404960703524e-10 | 1.98356984060796e-06 |
| FLT4 | 0.225596887373386 | 0.036592945724794 | 1.2530704349383 | 1.16634475066744 | 1.34624476512449 | 7.04663810620216e-10 | 2.05127635271545e-06 |
| PRTN3 | 0.228656373059286 | 0.0371826117176325 | 1.25691005663618 | 1.16856728311065 | 1.35193147481229 | 7.77025197636213e-10 | 2.26192035031902e-06 |
| CALCA | 0.270964945374081 | 0.0441543955939973 | 1.31122910493317 | 1.20252357766315 | 1.42976137645882 | 8.42212740000014e-10 | 2.45168128614004e-06 |
| IGFBP6 | 0.285095580742218 | 0.0464924373308323 | 1.32988913383743 | 1.21406035057692 | 1.45676869148921 | 8.67347005905848e-10 | 2.52484713419192e-06 |
| CCL20 | 0.232639984461812 | 0.0379739824299004 | 1.26192708417915 | 1.17141331212958 | 1.35943475227361 | 8.99465009014603e-10 | 2.61834264124151e-06 |
| CRLF1 | 0.230354646741461 | 0.0377846134997823 | 1.25904644748093 | 1.1691731671994 | 1.35582820525337 | 1.08402485093289e-09 | 3.15559634106564e-06 |
| SCGB3A1 | -0.243829981 | 0.0400376477416724 | 0.783620853618937 | 0.724478082006569 | 0.847591745668442 | 1.12898253003925e-09 | 3.28646814494427e-06 |
| TNFRSF9 | 0.239053628440818 | 0.0392848919102206 | 1.27004664537889 | 1.17592519798381 | 1.37170160500328 | 1.16397676120068e-09 | 3.38833635185517e-06 |
| CREG1 | 0.221810889341638 | 0.0364739145019516 | 1.24833528203383 | 1.16220843325474 | 1.34084466415922 | 1.1916974268525e-09 | 3.46903120956762e-06 |
| SCARA5 | 0.250351576272608 | 0.0411827833487606 | 1.28447692892352 | 1.18487030448946 | 1.39245702646561 | 1.20908062173336e-09 | 3.51963368986581e-06 |
| MMP9 | 0.226680330192282 | 0.0372948840498824 | 1.25442880082562 | 1.1660038122738 | 1.34955958100357 | 1.21649568542416e-09 | 3.54121894026972e-06 |
| EFEMP1 | 0.252211383507565 | 0.0415409557387541 | 1.28686803121452 | 1.18624292916158 | 1.39602883106953 | 1.26807043530323e-09 | 3.69135303716771e-06 |
| SLC39A14 | -0.234319361 | 0.0386319877934522 | 0.791109126323178 | 0.733419044073301 | 0.853337058546944 | 1.31606525550754e-09 | 3.83106595878245e-06 |
| IL16 | 0.228141530983068 | 0.0376239458497092 | 1.2562631130042 | 1.16695593936181 | 1.35240496737014 | 1.32998558312021e-09 | 3.87158803246295e-06 |
| ACY3 | 0.233123117601099 | 0.038468205399493 | 1.26253691027461 | 1.17084467762329 | 1.36140982682813 | 1.35994167161795e-09 | 3.95879020607985e-06 |
| LRRC25 | 0.216310892886335 | 0.0356990404287225 | 1.24148828888673 | 1.15759059721329 | 1.33146656093554 | 1.36722407892647e-09 | 3.97998929375495e-06 |
| TPP1 | 0.228326331220626 | 0.0376989424209173 | 1.25649529217864 | 1.167000059 | 1.35285376102013 | 1.39053555585224e-09 | 4.04784900308587e-06 |
| SUSD2 | -0.246947946 | 0.0408649760220264 | 0.781181356068114 | 0.721052521477508 | 0.846324356259051 | 1.51254091431202e-09 | 4.40300660156229e-06 |
| CD38 | 0.294884453666784 | 0.0488144865444601 | 1.34297117432615 | 1.22043586342012 | 1.47780938689943 | 1.5323706006392e-09 | 4.46073081846072e-06 |
| LBR | 0.214861386219088 | 0.0356100270661648 | 1.23969004693138 | 1.15611556291052 | 1.32930605015969 | 1.60214959273476e-09 | 4.66385746445088e-06 |
| OSCAR | 0.230074984188731 | 0.0381656232507529 | 1.25869438856857 | 1.16797369484693 | 1.35646168300189 | 1.65662188863108e-09 | 4.82242631780507e-06 |
| DUT | 0.231192957681204 | 0.038355915312023 | 1.26010236242219 | 1.16884416068747 | 1.35848560243315 | 1.6644335157339e-09 | 4.84516596430138e-06 |
| PHOSPHO1 | 0.238262023432166 | 0.0396814294538766 | 1.26904166791827 | 1.17408183100007 | 1.37168186440718 | 1.9207507851374e-09 | 5.59130553553498e-06 |
| GP2 | -0.227023482 | 0.0379939854424131 | 0.796902069137695 | 0.739713970714809 | 0.858511442175774 | 2.29740544208137e-09 | 6.68774724189886e-06 |
| MCAM | -0.237941223 | 0.0398966540783354 | 0.788249020929687 | 0.728958362415902 | 0.852362152671364 | 2.46228261187773e-09 | 7.16770468317606e-06 |
| IFNLR1 | 0.201907070908213 | 0.0339218567545518 | 1.22373428231178 | 1.14501785602847 | 1.30786221875993 | 2.64685984580944e-09 | 7.70500901115127e-06 |
| SYT1 | -0.269434912 | 0.0452738158675689 | 0.763810992719168 | 0.698953130473866 | 0.834687201705659 | 2.66134023370534e-09 | 7.74716142031624e-06 |
| HEPH | 0.25296509374029 | 0.0426379061124669 | 1.28783832243109 | 1.18458771919596 | 1.4000884171312 | 2.97687116787027e-09 | 8.66567196967037e-06 |
| ITGA2 | -0.22923586 | 0.038643419363597 | 0.79514096909397 | 0.737140356151991 | 0.857705259866865 | 2.99120555858783e-09 | 8.70739938104917e-06 |
| SERPINA7 | 0.230055771516371 | 0.0388151717680914 | 1.25867020591799 | 1.1664652649136 | 1.35816362039977 | 3.08603734776761e-09 | 8.9834547193515e-06 |
| KLRB1 | 0.233211508295678 | 0.039397163553978 | 1.26264851172124 | 1.16881810049899 | 1.36401144324444 | 3.22921907327851e-09 | 9.40025672231374e-06 |
| GRPEL1 | 0.213598194398405 | 0.0361306203717955 | 1.23812506924552 | 1.15347852184311 | 1.32898329536709 | 3.38321429193807e-09 | 9.84853680383172e-06 |
| LILRB2 | 0.217310430051154 | 0.0367935302244737 | 1.24272982294751 | 1.15626514809196 | 1.33566026390369 | 3.50061111319175e-09 | 1.01902789505012e-05 |
| HEG1 | 0.248684017882447 | 0.0421374576039515 | 1.28233677355668 | 1.18068479037697 | 1.39274056396604 | 3.59703284369561e-09 | 1.04709626079979e-05 |
| NADK | 0.21752842271305 | 0.036888983394127 | 1.24300075845953 | 1.15630088238186 | 1.3362014239307 | 3.70529444179239e-09 | 1.07861121200577e-05 |
| SEZ6L2 | -0.24452334 | 0.0415070632724843 | 0.783077710748817 | 0.721893841750846 | 0.849447197920898 | 3.8357289223673e-09 | 1.11658068930112e-05 |
| CCN3 | 0.247827019194633 | 0.0421116543361978 | 1.28123828339395 | 1.17973304129979 | 1.3914771235242 | 3.98057797174423e-09 | 1.15874624757475e-05 |
| PHLDB1 | 0.226378782050962 | 0.0384991794837601 | 1.25405058717998 | 1.16290407590877 | 1.35234101228642 | 4.10034346528111e-09 | 1.19360998274333e-05 |
| GAS6 | 0.225083105245897 | 0.0382890330531076 | 1.25242679510383 | 1.16187676717631 | 1.350033774 | 4.13933910115816e-09 | 1.20496161234714e-05 |
| CD79B | 0.22630688393959 | 0.0385674523806646 | 1.25396042655243 | 1.16266487603914 | 1.35242474746147 | 4.41561164076668e-09 | 1.28538454862718e-05 |
| CLEC4G | 0.218729467775655 | 0.0373049362195932 | 1.24449455526237 | 1.15674704332797 | 1.33889834169955 | 4.53798708104382e-09 | 1.32100803929186e-05 |
| IL18 | 0.219172950408411 | 0.0374535568978059 | 1.24504658938391 | 1.15692309754934 | 1.33988249782557 | 4.86107384353403e-09 | 1.41505859585276e-05 |
| BAG3 | 0.227415948226335 | 0.0389902960228792 | 1.25535192076415 | 1.16299080592236 | 1.35504806825743 | 5.4560650602679e-09 | 1.58826053904399e-05 |
| SMOC1 | 0.251226699978824 | 0.0431381828238013 | 1.28560149713048 | 1.18137127549801 | 1.39902776011497 | 5.75359809936951e-09 | 1.67487240672646e-05 |
| F3 | -0.219888738 | 0.0378042787717331 | 0.802608092603221 | 0.745287577805388 | 0.864337162587715 | 6.00911099877642e-09 | 1.74925221174381e-05 |
| LGALS4 | 0.23288090838279 | 0.0400588155465333 | 1.26223114922706 | 1.16691746871904 | 1.36533003985962 | 6.11892445748976e-09 | 1.78121890957527e-05 |
| OMD | -0.223726408 | 0.0385668406833681 | 0.799533850210513 | 0.74132406387873 | 0.862314349122518 | 6.59189123716003e-09 | 1.91889953913728e-05 |
| EFNA1 | 0.24238356869268 | 0.0417856039121004 | 1.27428287410491 | 1.17407873532888 | 1.38303913900817 | 6.60592442850822e-09 | 1.92298460113874e-05 |
| DSC2 | 0.236940271871529 | 0.041091846875168 | 1.26736541815009 | 1.16929412174731 | 1.37366217211675 | 8.11202179900707e-09 | 2.36140954569096e-05 |
| TMSB10 | 0.207434385304747 | 0.0360290635455617 | 1.2305169741949 | 1.14661878061711 | 1.32055400572356 | 8.54101457487167e-09 | 2.48628934274514e-05 |
| EGLN1 | 0.204345271788541 | 0.0355446466009301 | 1.22672163271645 | 1.14416803332747 | 1.31523160964227 | 8.97862841298277e-09 | 2.61367873101929e-05 |
| TCOF1 | 0.201565137737887 | 0.035130886238618 | 1.2233159184993 | 1.14191719598414 | 1.31051694616443 | 9.60571953928264e-09 | 2.79622495788518e-05 |
| CTSF | -0.210892141 | 0.0367927920448268 | 0.809861412691296 | 0.753515256352386 | 0.870421006392493 | 9.93191959271474e-09 | 2.89118179343926e-05 |
| ANGPT2 | 0.224226790144539 | 0.0392010432858507 | 1.25135478218177 | 1.15880899045861 | 1.35129154483817 | 1.06574882196159e-08 | 3.1023948207302e-05 |
| ACVRL1 | 0.250287033428872 | 0.0438410390718594 | 1.28439402780518 | 1.17863689479576 | 1.39964057289032 | 1.13664105702636e-08 | 3.30876211700373e-05 |
| FNDC1 | 0.218497678180821 | 0.0383407985105865 | 1.24420612780216 | 1.15413334664997 | 1.34130851773227 | 1.20632710597537e-08 | 3.5116182054943e-05 |
| SGSH | 0.211176422971526 | 0.0371008424569328 | 1.23513024118814 | 1.14850232985971 | 1.32829222286717 | 1.25591029936834e-08 | 3.65595488146124e-05 |
| CNTN5 | -0.222020916 | 0.0390414846163289 | 0.80089861232764 | 0.741898953657193 | 0.864590230335771 | 1.29445749755853e-08 | 3.76816577539289e-05 |
| CCL21 | 0.221749092633339 | 0.0389974764950717 | 1.24825814140609 | 1.15640266844574 | 1.34740988593601 | 1.29865259564049e-08 | 3.78037770590948e-05 |
| POLR2F | 0.199612013356721 | 0.0352436528216301 | 1.22092896212315 | 1.13943719718858 | 1.30824896205702 | 1.48081155517772e-08 | 4.31064243712233e-05 |
| BST2 | 0.207390411216252 | 0.0366876547248185 | 1.23046286452231 | 1.14508928021766 | 1.32220158473639 | 1.57793942614328e-08 | 4.5933816695031e-05 |
| CD302 | 0.241471778117993 | 0.0427242805880447 | 1.27312152452507 | 1.1708525845366 | 1.38432321678696 | 1.58718130548984e-08 | 4.62028478028094e-05 |
| CXCL13 | 0.213721978914696 | 0.0379252898206776 | 1.23827833944437 | 1.149570519 | 1.33383139234898 | 1.74711254078344e-08 | 5.08584460622059e-05 |
| SERPINB8 | 0.20324274462477 | 0.0361027106346876 | 1.22536988410071 | 1.14165781733975 | 1.31522013869252 | 1.80659213135389e-08 | 5.25898969437117e-05 |
| TNFRSF4 | 0.221300749549552 | 0.0393616237296911 | 1.24769861893999 | 1.1550596261798 | 1.34776751642987 | 1.88490091454102e-08 | 5.48694656222892e-05 |
| AMBP | 0.2386568575286 | 0.0424942466476245 | 1.26954282776954 | 1.16808789494867 | 1.37980968599277 | 1.95184916713436e-08 | 5.68183292552812e-05 |
| CDCP1 | 0.24525327408017 | 0.0437885467321177 | 1.27794494254953 | 1.17283948923366 | 1.39246955033465 | 2.13297858100048e-08 | 6.20910064929241e-05 |
| DLL1 | 0.225513764620707 | 0.0403072416582661 | 1.25296628060331 | 1.15778832747554 | 1.35596849879458 | 2.20787535488838e-08 | 6.42712515808008e-05 |
| SERPINC1 | -0.210815265 | 0.0377465722513248 | 0.809923674598154 | 0.752165765664772 | 0.872116744232326 | 2.33676751738232e-08 | 6.80233024309995e-05 |
| CNTN1 | -0.223538929 | 0.0401666864815436 | 0.799683760169653 | 0.739141697084147 | 0.865184739004479 | 2.6172909972919e-08 | 7.61893409311671e-05 |
| GLB1 | 0.200141651205318 | 0.0359673136574208 | 1.22157578358738 | 1.13842498660971 | 1.31079993201056 | 2.6284082559483e-08 | 7.65129643306552e-05 |
| MYBPC1 | 0.220624478861353 | 0.0396753138385719 | 1.24685512218451 | 1.15356928718071 | 1.34768471473201 | 2.68618632957334e-08 | 7.81948840538798e-05 |
| NIT2 | 0.210181083273988 | 0.0378463607640527 | 1.23390147864697 | 1.1456844326309 | 1.32891118674882 | 2.79949827703535e-08 | 8.14933948444991e-05 |
| FCRL5 | 0.212563051229538 | 0.038288503020815 | 1.2368440956478 | 1.14742188356273 | 1.33323526320491 | 2.83041423854372e-08 | 8.23933584840077e-05 |
| MEP1B | 0.204093727864871 | 0.0368244252992242 | 1.22641309715046 | 1.14101458595086 | 1.31820320562226 | 2.98444846012359e-08 | 8.68772946741976e-05 |
| IGFBPL1 | 0.224553010841303 | 0.0405615138291428 | 1.2517630666025 | 1.15610019889204 | 1.3553416705678 | 3.09263005315991e-08 | 9.00264608474851e-05 |
| GCHFR | 0.206846736946816 | 0.0375028836814112 | 1.22979407534158 | 1.14263966904467 | 1.32359615084055 | 3.47811788081005e-08 | 0.000101248011510381 |
| VWC2 | 0.224209525862866 | 0.0406720056782899 | 1.25133317862682 | 1.15545290740295 | 1.35516966022591 | 3.53520420092128e-08 | 0.000102909794288818 |
| ANGPTL3 | -0.224482133 | 0.0407415860785014 | 0.798929851076984 | 0.737613251145144 | 0.865343601068647 | 3.59034216955829e-08 | 0.000104514860555842 |
| LECT2 | 0.237449230964043 | 0.0432427883184676 | 1.26801061947981 | 1.16496770529877 | 1.38016781392341 | 3.99503174011902e-08 | 0.000116295373954865 |
| RGMA | -0.2024605 | 0.0369121714842578 | 0.81671874260801 | 0.759717704770281 | 0.877996524681364 | 4.13644397235771e-08 | 0.000120411884035333 |
| FCER2 | 0.20259351265993 | 0.036938839901858 | 1.22457459299534 | 1.13904863860195 | 1.31652230026829 | 4.14485260118726e-08 | 0.000120656659220561 |
| ENG | -0.197593207 | 0.0360517670055748 | 0.820703641485699 | 0.764713006352426 | 0.880793790026729 | 4.23361581574885e-08 | 0.000123240556396449 |
| CSPG4 | -0.221353775 | 0.0405344673886839 | 0.801433103075431 | 0.740224817747553 | 0.867702626695993 | 4.73785963823499e-08 | 0.000137919094069021 |
| SEZ6 | -0.21718017 | 0.0397797686385363 | 0.804784957876899 | 0.744421020187833 | 0.870043712980457 | 4.77306777857564e-08 | 0.000138944003034337 |
| ROR1 | -0.21075473 | 0.038648637142082 | 0.809972704831208 | 0.750882529354702 | 0.873712940338867 | 4.95003207940246e-08 | 0.000144095433831406 |
| AKR7L | 0.196086336241113 | 0.0359615831800576 | 1.21663194022863 | 1.13383039792578 | 1.30548032641596 | 4.96215010098114e-08 | 0.000144448189439561 |
| PCSK9 | 0.206830764021366 | 0.0379603594253184 | 1.22977443208937 | 1.14159734277755 | 1.32476232831898 | 5.07682231990362e-08 | 0.000147786297732394 |
| CEACAM8 | 0.208646604259593 | 0.038340181240682 | 1.23200953466756 | 1.14282109360095 | 1.32815845105654 | 5.2690784241559e-08 | 0.000153382872927178 |
| TCL1A | 0.201199002474469 | 0.0369801805342866 | 1.22286810138906 | 1.13736916861661 | 1.31479420636463 | 5.30640947585231e-08 | 0.000154469579842061 |
| PIGR | 0.227158080629609 | 0.041810986565935 | 1.25502824791546 | 1.15628068394736 | 1.3622089557776 | 5.54219082575589e-08 | 0.000161333174937754 |
| PIK3IP1 | 0.2406766300841 | 0.0443182882168177 | 1.27210960681344 | 1.16627252283715 | 1.38755121128153 | 5.61525821647744e-08 | 0.000163460166681658 |
| CPXM2 | 0.228555724727296 | 0.0421120534220184 | 1.25678355710161 | 1.15721481908271 | 1.36491935927075 | 5.72054842186982e-08 | 0.000166525164560631 |
| PTGDS | 0.227380889621344 | 0.0419407403930904 | 1.2553079106485 | 1.15624425184043 | 1.36285905683723 | 5.91075763771331e-08 | 0.000172062154833835 |
| CD300A | 0.22295550152302 | 0.0412120156687994 | 1.24976495986133 | 1.15278407430366 | 1.3549046085154 | 6.30375871625612e-08 | 0.000183502416230216 |
| CLEC4D | 0.213170732391023 | 0.0394148596135896 | 1.23759593091935 | 1.14558750194351 | 1.3369940625484 | 6.3595629583357e-08 | 0.000185126877717152 |
| MMP8 | 0.199498690701335 | 0.0369582666629725 | 1.22079061105043 | 1.13548569901082 | 1.31250417097035 | 6.74085238622584e-08 | 0.000196226212963034 |
| LAMP2 | 0.207843180542722 | 0.0386106365987004 | 1.23102010650624 | 1.14129813880583 | 1.327795474 | 7.32321479817205e-08 | 0.000213178782774788 |
| ANXA2 | 0.20136264170917 | 0.0374231608772184 | 1.22306822696306 | 1.1365680580209 | 1.31615161736232 | 7.41985173936642e-08 | 0.000215991884132956 |
| EGFR | -0.202328096 | 0.0377491423951966 | 0.816826886024608 | 0.758572868585754 | 0.87955447573094 | 8.33111663712611e-08 | 0.000242518805306741 |
| CD27 | 0.213544686889067 | 0.0398593606395155 | 1.23805882202919 | 1.14501798010985 | 1.33865989305885 | 8.44028962255859e-08 | 0.00024569683091268 |
| HIP1R | 0.19870360768602 | 0.037094017866466 | 1.21982036693375 | 1.1342814113402 | 1.3118100258985 | 8.47293572917373e-08 | 0.000246647159076247 |
| NUCB2 | 0.193222027908446 | 0.0362678138284719 | 1.21315211724654 | 1.1299090161539 | 1.30252793679744 | 9.94944813787822e-08 | 0.000289628435293635 |
| KLK6 | -0.193095917 | 0.0364962044254592 | 0.824402896362005 | 0.767491037319211 | 0.885534947618404 | 1.21749674124863e-07 | 0.000354413301377475 |
| TNFSF14 | 0.190904885744204 | 0.0362153172685354 | 1.21034432560651 | 1.12740988422129 | 1.29937958415162 | 1.35398001177514e-07 | 0.000394143581427743 |
| ECHS1 | 0.201502083848537 | 0.0383450122609056 | 1.22323878610451 | 1.13467453875504 | 1.31871569928077 | 1.48044516137326e-07 | 0.000430957586475757 |
| CXCL10 | 0.192069997751185 | 0.0365614537173941 | 1.21175533414474 | 1.12795871075474 | 1.30177725108902 | 1.49359876930889e-07 | 0.000434786601745818 |
| GASK1A | 0.195474790286272 | 0.0372626387263163 | 1.21588814134383 | 1.1302513237384 | 1.30801348444404 | 1.55550367832237e-07 | 0.000452807120759643 |
| TNFSF13B | 0.209184207645945 | 0.0400692227827447 | 1.23267204523342 | 1.1395671883686 | 1.33338375008429 | 1.78372660957301e-07 | 0.000519242816046703 |
| P4HB | 0.185710294045551 | 0.0356481472139227 | 1.20407338261555 | 1.12281612352452 | 1.29121116124727 | 1.89313823246439e-07 | 0.000551092539470384 |
| SCPEP1 | 0.189738449787286 | 0.0364232102568283 | 1.20893335952564 | 1.12563684246555 | 1.29839377376161 | 1.89581881335686e-07 | 0.000551872856568181 |
| SELPLG | 0.199426505357538 | 0.0382928213160875 | 1.22070249104099 | 1.13243771104539 | 1.3158468294544 | 1.90954299196544e-07 | 0.00055586796496114 |
| CKAP4 | 0.214991952106882 | 0.0413146634043653 | 1.23985191873019 | 1.14341021287908 | 1.34442806532942 | 1.95287050394345e-07 | 0.000568480603697939 |
| DPP6 | -0.202094669 | 0.0388783382084755 | 0.817017578203245 | 0.75707253456016 | 0.881709073597428 | 2.01302981242865e-07 | 0.000585992978397981 |
| WIF1 | -0.198683313 | 0.038254560335607 | 0.819809475440447 | 0.760588920029368 | 0.883641029106748 | 2.06137793658692e-07 | 0.000600067117340452 |
| BOC | -0.189849217 | 0.03655403314894 | 0.827083835062443 | 0.769899631322616 | 0.888515388748056 | 2.06199666347469e-07 | 0.000600247228737481 |
| CEACAM16 | 0.20285259161061 | 0.0390737614285554 | 1.22489189559736 | 1.13458621843823 | 1.32238531679447 | 2.08573346101929e-07 | 0.000607157010502716 |
| HAVCR1 | 0.229247005856468 | 0.0442722710922052 | 1.25765264821663 | 1.15312235504446 | 1.37165858995536 | 2.24136484910352e-07 | 0.000652461307574036 |
| TNF | 0.189853432538726 | 0.0367345385397816 | 1.2090723740016 | 1.12507954182424 | 1.29933569248231 | 2.36290805327735e-07 | 0.000687842534309037 |
| PXN | 0.179682807595896 | 0.0347752425668895 | 1.19683767508843 | 1.11797982859082 | 1.28125784014959 | 2.37913121011688e-07 | 0.000692565095265025 |
| GSR | 0.201894549472383 | 0.0390896587294925 | 1.22371895949742 | 1.13346443971246 | 1.32116018762206 | 2.40555291264868e-07 | 0.000700256452872031 |
| FCAR | 0.188519555428171 | 0.0365257675949788 | 1.20746069516664 | 1.12403967730515 | 1.29707283453527 | 2.45272690629627e-07 | 0.000713988802422843 |
| IL12RB1 | 0.181677049917938 | 0.0352548069131827 | 1.19922684092871 | 1.11915913203781 | 1.28502281296246 | 2.56001924575785e-07 | 0.00074522160244011 |
| QDPR | 0.188960726080593 | 0.0366713854539904 | 1.20799350891155 | 1.12421477096638 | 1.29801560632231 | 2.56610267886836e-07 | 0.000746992489818578 |
| CSF3 | 0.185720540579043 | 0.0360492644335953 | 1.20408572 | 1.12194521989904 | 1.29223993828976 | 2.57924055500958e-07 | 0.00075081692556329 |
| WARS | 0.179197135563088 | 0.0347927277075305 | 1.19625654563241 | 1.11739869399864 | 1.28067960939477 | 2.59904775308903e-07 | 0.000756582800924217 |
| ICAM4 | -0.182859245 | 0.0355061930116515 | 0.83288538009197 | 0.776893981775868 | 0.892912125262255 | 2.6039450643491e-07 | 0.000758008408232022 |
| AHSG | 0.194700204433207 | 0.037838398457371 | 1.21494669625273 | 1.12810241619878 | 1.3084764765501 | 2.6670685049407e-07 | 0.000776383641788237 |
| SERPINE1 | 0.189851284205044 | 0.036954660720986 | 1.20906977651349 | 1.12459182679221 | 1.29989360552989 | 2.78549164514934e-07 | 0.000810856617902972 |
| IGDCC4 | -0.198273623 | 0.038603567736115 | 0.820145411774324 | 0.760380269846918 | 0.88460803512155 | 2.80427395844909e-07 | 0.000816324149304531 |
| FCN2 | 0.197906847336893 | 0.0385353283035983 | 1.21884884951699 | 1.13018078184503 | 1.3144733496031 | 2.81058454918819e-07 | 0.000818161162268681 |
| LCN2 | 0.210700469659621 | 0.0410691777709062 | 1.23454251673501 | 1.13906173178656 | 1.33802688923273 | 2.89158544073538e-07 | 0.000841740521798068 |
| CD8A | 0.183969092730983 | 0.0359122963637986 | 1.20197867264401 | 1.12028261898886 | 1.28963237044153 | 3.0113920199342e-07 | 0.000876616217002845 |
| OMG | -0.185679866 | 0.0362660658057264 | 0.830539436299263 | 0.773552796225714 | 0.891724208889062 | 3.05642484705067e-07 | 0.000889725272976451 |
| LRP11 | 0.201913618149155 | 0.0394370699802008 | 1.2237422944212 | 1.1327144961194 | 1.32208531654336 | 3.05707431783337e-07 | 0.000889914333921295 |
| TGFB1 | 0.185702679215997 | 0.0363382526974229 | 1.20406421383688 | 1.12128988305399 | 1.2929489982501 | 3.21492768683379e-07 | 0.000935865449637317 |
| CCL19 | 0.184875475455484 | 0.0361965400894633 | 1.20306861922787 | 1.12067396286003 | 1.29152112972899 | 3.26370523365214e-07 | 0.000950064593516138 |
| NT5E | 0.178476194608778 | 0.0351450687164666 | 1.19539442610278 | 1.11582256560413 | 1.2806407380585 | 3.80884505692359e-07 | 0.00110875479607046 |
| RNASET2 | 0.199044309341145 | 0.0392695859587281 | 1.22023603255668 | 1.12983987694164 | 1.31786459792884 | 4.00619177128098e-07 | 0.00116620242461989 |
| ERMAP | 0.198276507346444 | 0.0391204055098824 | 1.21929949248155 | 1.12930286932862 | 1.31646814397065 | 4.01246698671303e-07 | 0.00116802913983216 |
| PGLYRP1 | 0.185801790263119 | 0.0366890492998458 | 1.20418355581587 | 1.12063025379162 | 1.29396652570385 | 4.10053984533546e-07 | 0.00119366714897715 |
| ADA2 | 0.197475502712955 | 0.039011774019697 | 1.21832321899046 | 1.12863893633495 | 1.31513402395216 | 4.14998064841731e-07 | 0.00120805936675428 |
| PKD2 | 0.181121058986953 | 0.0357843834553503 | 1.19856026700266 | 1.1173766570556 | 1.28564231637247 | 4.16068191637789e-07 | 0.0012111745058576 |
| TREM2 | 0.207238579328261 | 0.0410203218979025 | 1.23027605520465 | 1.13523394474101 | 1.33327511833273 | 4.36989341330207e-07 | 0.00127207597261223 |
| SIAE | 0.179950469837124 | 0.0356667855191821 | 1.19715806621932 | 1.11632670799902 | 1.28384228850255 | 4.52754759578615e-07 | 0.00131796910513335 |
| ITGAL | 0.200479124926531 | 0.0397446635464321 | 1.22198810288236 | 1.13040907939496 | 1.32098631442813 | 4.55477098749643e-07 | 0.00132589383446021 |
| C1S | 0.188605887874771 | 0.0374186601913253 | 1.20756494270253 | 1.12217112567736 | 1.29945697004453 | 4.64503189509451e-07 | 0.00135216878466201 |
| IL32 | -0.194743409 | 0.0386446679746981 | 0.823045817342497 | 0.76300785111634 | 0.887807925506774 | 4.67153382272557e-07 | 0.00135988349579541 |
| ADAMTS8 | -0.183033199 | 0.0363612288707766 | 0.832740508875529 | 0.775458192741668 | 0.894254212042724 | 4.80986273642551e-07 | 0.00140015104257347 |
| PSME2 | 0.183926626629197 | 0.0365977789907699 | 1.20192763037914 | 1.11873096932977 | 1.2913113771529 | 5.01801763415832e-07 | 0.00146074493330349 |
| VSTM2L | 0.165778722783291 | 0.0329899848837179 | 1.18031189669363 | 1.10640758001971 | 1.25915277392776 | 5.03110695910186e-07 | 0.00146455523579455 |
| GPR158 | -0.205339581 | 0.0408830744711334 | 0.81437072477683 | 0.751660584907259 | 0.882312696302104 | 5.09750101977941e-07 | 0.00148388254685779 |
| SEPTIN8 | 0.203879779953569 | 0.0406054085583658 | 1.22615073669667 | 1.13234780313846 | 1.32772424244103 | 5.14030040956738e-07 | 0.00149634144922506 |
| CA9 | -0.200962367 | 0.0401197550316977 | 0.817943212674042 | 0.756088318048622 | 0.884858399725347 | 5.46957643492532e-07 | 0.00159219370020676 |
| ENPP5 | -0.177157714 | 0.0353686513244742 | 0.83764766552511 | 0.781546781009021 | 0.897775576087451 | 5.47446091512081e-07 | 0.00159361557239167 |
| ST6GAL1 | 0.187120354392728 | 0.0376581915657561 | 1.20577239632189 | 1.11997940744018 | 1.29813732473424 | 6.73285603720341e-07 | 0.00195993439242991 |
| LRP1 | -0.185803394 | 0.0374078706708932 | 0.830436848063401 | 0.771728233408473 | 0.893611674119561 | 6.80106432947261e-07 | 0.00197978982630948 |
| KCTD5 | 0.173473982251975 | 0.0349836599521878 | 1.18942974008376 | 1.11060621817831 | 1.27384763693856 | 7.09611561120116e-07 | 0.00206567925442066 |
| MB | 0.201758843795099 | 0.0408187284472429 | 1.22355290515473 | 1.12947637010484 | 1.32546527872347 | 7.70081561054246e-07 | 0.00224170742422891 |
| RBP7 | 0.185024939741619 | 0.0374619651702388 | 1.2032484484589 | 1.11806497252936 | 1.29492190909391 | 7.85210552206116e-07 | 0.002285747917472 |
| PDCD1 | 0.182287084122758 | 0.0369132288138962 | 1.19995863350758 | 1.11620792089062 | 1.28999328456697 | 7.88231143028032e-07 | 0.0022945408573546 |
| VWC2L | -0.205909704 | 0.0417089207047219 | 0.813906565289527 | 0.750017162930924 | 0.883238317417552 | 7.94040594510299e-07 | 0.00231145217061948 |
| DDC | -0.188181959 | 0.0381322856395295 | 0.828463946881259 | 0.768802446536239 | 0.892755368267055 | 8.0160134443795e-07 | 0.00233346151365887 |
| ATRN | 0.187369325519894 | 0.0379795609098969 | 1.20607263620849 | 1.11955287420345 | 1.29927870074544 | 8.07999649502221e-07 | 0.00235208697970096 |
| BAP18 | 0.176599226264366 | 0.0360017481793004 | 1.19315281298244 | 1.11186168025645 | 1.28038735429713 | 9.3286618277284e-07 | 0.00271557345805174 |
| HHEX | 0.186784497008694 | 0.0382012508338057 | 1.20536749675718 | 1.11841224976475 | 1.29908341270786 | 1.01099398939888e-06 | 0.00294300350314014 |
| IL1R1 | -0.186101911 | 0.0382493226864404 | 0.830188985111575 | 0.770226552279972 | 0.894819516362326 | 1.14170351630974e-06 | 0.00332349893597766 |
| VWF | 0.174699971224962 | 0.0359148418714261 | 1.19088886208022 | 1.10994102264119 | 1.27774021582873 | 1.14872190477737e-06 | 0.00334392946480693 |
| ADGRE1 | 0.182418085658106 | 0.037563393744277 | 1.20011584022786 | 1.11493246538841 | 1.29180741854535 | 1.19615909443746e-06 | 0.00348201912390744 |
| SLAMF8 | 0.182213161530466 | 0.0375455408997486 | 1.19986993273328 | 1.11474301816594 | 1.29149753083545 | 1.21531713961174e-06 | 0.00353778819340977 |
| FAS | 0.183214750262014 | 0.0377572157171246 | 1.20107231098096 | 1.11539723658111 | 1.29332819635352 | 1.2194962562149e-06 | 0.00354995360184156 |
| GUCA2A | -0.188780477 | 0.0389073873478149 | 0.827968245136634 | 0.767176063422414 | 0.893577690493162 | 1.22193582253371e-06 | 0.00355705517939562 |
| ERP44 | 0.174567452585762 | 0.0359895595836639 | 1.19073105756503 | 1.10963143073429 | 1.27775801241651 | 1.23149015148435e-06 | 0.00358486783097094 |
| GCNT1 | 0.176192836792908 | 0.0363704132920688 | 1.19266802675408 | 1.11060712664876 | 1.28079226930024 | 1.26994742091066e-06 | 0.00369681694227093 |
| ISM1 | 0.175130092533806 | 0.0362979969628647 | 1.19140119893187 | 1.1095849411304 | 1.2792502531354 | 1.40153186347357e-06 | 0.00407985925457155 |
| SUSD5 | -0.20144624 | 0.0417565779436657 | 0.817547528120146 | 0.75330195244575 | 0.887272306364418 | 1.40496143366439e-06 | 0.00408984273339704 |
| RPL14 | 0.166999516001299 | 0.0346232473451826 | 1.18175369334097 | 1.10421861734099 | 1.26473306082084 | 1.41177656743728e-06 | 0.00410968158780994 |
| SRP14 | 0.169690078340615 | 0.0352639700408691 | 1.1849375565932 | 1.10580402748444 | 1.26973403797341 | 1.49430439524756e-06 | 0.00434992009456564 |
| CD6 | 0.174939060599869 | 0.0363768125939436 | 1.19117362499438 | 1.10920163402612 | 1.27920349317555 | 1.51625295889479e-06 | 0.00441381236334274 |
| MAN2B2 | 0.184033902221326 | 0.0383490699096705 | 1.20205657479356 | 1.11501708225007 | 1.295890468 | 1.59527985380568e-06 | 0.00464385965442832 |
| ELOA | 0.166287609943518 | 0.0346806436832632 | 1.18091269511926 | 1.10330867146478 | 1.26397519530268 | 1.62817075298925e-06 | 0.00473960506195172 |
| ADGRE5 | 0.18256160145418 | 0.0380893633309677 | 1.2002880881679 | 1.11394353034321 | 1.29332542930059 | 1.64321048114364e-06 | 0.00478338571060915 |
| IGFBP7 | 0.196270037381043 | 0.0409584567914342 | 1.21685545743248 | 1.12298628411385 | 1.31857105044846 | 1.65184951809567e-06 | 0.00480853394717649 |
| OBP2B | -0.209536636 | 0.0437456191223452 | 0.81095992821687 | 0.744324599307317 | 0.88356075532844 | 1.66874043045604e-06 | 0.00485770339305753 |
| CFC1 | 0.160305697745588 | 0.0336518442567725 | 1.17386966545803 | 1.0989422024512 | 1.25390579086778 | 1.90119643899784e-06 | 0.00553438283392272 |
| EDN1 | 0.204883831026805 | 0.043049418326136 | 1.22738247291936 | 1.12806860482595 | 1.33543982022446 | 1.94293807532943e-06 | 0.00565589273728396 |
| UNC5D | -0.184641433 | 0.0388136088699388 | 0.831402343890227 | 0.770499628525203 | 0.897119001535706 | 1.96363473494553e-06 | 0.00571614071342644 |
| NUDT5 | 0.171043573732874 | 0.0359669320581409 | 1.18654244997906 | 1.10577714553659 | 1.27320680417854 | 1.97878814627231e-06 | 0.00576025229379871 |
| TP53I3 | 0.17709323373766 | 0.0372399347073623 | 1.19374238500334 | 1.1097147071589 | 1.28413264468829 | 1.97989434058254e-06 | 0.00576347242543579 |
| MTDH | 0.178790809339704 | 0.0376744421976638 | 1.19577057396623 | 1.1106538574172 | 1.28741034482936 | 2.07808042624599e-06 | 0.00604929212080208 |
| NEFL | -0.20752556 | 0.0438043957851716 | 0.812592471440792 | 0.745737083422195 | 0.885441450238872 | 2.16316399533152e-06 | 0.00629697039041005 |
| SCAMP3 | 0.166988665569158 | 0.0353516958546073 | 1.18174087087228 | 1.10263122003249 | 1.26652634218793 | 2.31660965123269e-06 | 0.00674365069473835 |
| B2M | 0.208244393731837 | 0.0441595160153557 | 1.23151410710219 | 1.12940590009717 | 1.3428537923002 | 2.40844596782039e-06 | 0.00701098621232515 |
| PTPRK | 0.16705561852221 | 0.0354954477464122 | 1.18181999456208 | 1.1023943994496 | 1.26696806537121 | 2.52135034600274e-06 | 0.00733965085721397 |
| PLIN3 | 0.167915017140129 | 0.0357166140679948 | 1.18283608558311 | 1.10286402314717 | 1.26860716823915 | 2.58492681330792e-06 | 0.00752472195353935 |
| ENPP7 | 0.173195209029166 | 0.0368759849928075 | 1.18909820513549 | 1.10618623880806 | 1.27822467126332 | 2.64406398721413e-06 | 0.00769687026678033 |
| EXTL1 | -0.176328916 | 0.0375909369040721 | 0.838342194074301 | 0.778795213083265 | 0.902442160093466 | 2.72232716309335e-06 | 0.00792469437176476 |
| COCH | 0.182074023657231 | 0.0388647879419802 | 1.19970299699649 | 1.11170963184779 | 1.29466115950629 | 2.80224101832427e-06 | 0.00815732360434195 |
| MAMDC2 | 0.189205292074195 | 0.0403936256422549 | 1.20828897917384 | 1.11631578546078 | 1.30783983905622 | 2.81277329952445e-06 | 0.00818798307491567 |
| IFNL1 | 0.161977933783766 | 0.034599056263088 | 1.17583429482093 | 1.09873968662149 | 1.25833835412675 | 2.84684948670647e-06 | 0.00828717885580254 |
| APEX1 | 0.168099070514085 | 0.0359509633111612 | 1.18305381059139 | 1.10256047828782 | 1.26942362465984 | 2.92827487708909e-06 | 0.00852420816720634 |
| MYL3 | 0.183202055062689 | 0.0391862786662656 | 1.20105706322536 | 1.11226330055721 | 1.29693937433775 | 2.93726993742492e-06 | 0.00855039278784395 |
| CHCHD6 | 0.174444103175177 | 0.0373442237719368 | 1.19058419064908 | 1.10655260876762 | 1.28099712909465 | 2.99376292613148e-06 | 0.00871484387796873 |
| CEBPB | 0.166316634675052 | 0.0356195502730323 | 1.18094697129063 | 1.10131213193382 | 1.26634013061459 | 3.02299277235675e-06 | 0.00879993196033051 |
| DDAH1 | 0.17022003550222 | 0.0364687319132903 | 1.18556568916435 | 1.1037807376758 | 1.27341052017577 | 3.04796082189136e-06 | 0.00887261395252574 |
| DNM3 | 0.171997236442644 | 0.0368849803909491 | 1.18767455100263 | 1.10484237184076 | 1.27671681956691 | 3.1152709983411e-06 | 0.00906855387617096 |
| CALB1 | -0.173045356 | 0.0372686574832144 | 0.841099465053836 | 0.781850350271823 | 0.904838515283511 | 3.4307512146372e-06 | 0.00998691678580889 |
| CELA2A | -0.180782621 | 0.038949020739904 | 0.834616766771444 | 0.773273325693099 | 0.900826556705104 | 3.45857141780534e-06 | 0.0100679013972313 |
| ICAM5 | -0.173428113 | 0.0375267721428927 | 0.840777589850254 | 0.781155858322019 | 0.904949950849618 | 3.81066593837617e-06 | 0.011092848546613 |
| PSME1 | 0.169986908683951 | 0.0368303029368389 | 1.18528933422151 | 1.10274167969975 | 1.27401623760317 | 3.9232207082947e-06 | 0.0114204954818459 |
| QPCT | 0.176246304074765 | 0.0382219591532841 | 1.19273179717643 | 1.10664317224333 | 1.28551747815141 | 4.00491946032789e-06 | 0.0116583205490145 |
| F11R | 0.163243122 | 0.0354035807275263 | 1.17732288850617 | 1.09839728557074 | 1.26191970975264 | 4.00888408545832e-06 | 0.0116698615727692 |
| REG4 | -0.189650548 | 0.0411546919706687 | 0.827248167071331 | 0.763140026066098 | 0.896741759766647 | 4.06098874412567e-06 | 0.0118215382341498 |
| VIT | 0.196167877893122 | 0.0426265454462903 | 1.21673115045175 | 1.11920638443782 | 1.32275397376621 | 4.18428890545986e-06 | 0.0121804650037936 |
| CES3 | 0.157340839790643 | 0.0341933140800451 | 1.17039446292896 | 1.09452660347341 | 1.25152115490634 | 4.19441188442275e-06 | 0.0122099329955546 |
| CTSV | -0.182795105 | 0.0397697888283934 | 0.832938803638469 | 0.770478221034657 | 0.900462896504737 | 4.2999588333771e-06 | 0.0125171801639608 |
| CTBS | 0.17485690808075 | 0.0381046712178448 | 1.1910757710999 | 1.10536075023848 | 1.28343754941104 | 4.45678425567888e-06 | 0.0129736989682812 |
| HSDL2 | 0.169087331513214 | 0.0369041489705456 | 1.18422355444318 | 1.10159067069776 | 1.27305492339523 | 4.60996545491258e-06 | 0.0134196094392505 |
| XG | 0.239585427317304 | 0.0522911485463381 | 1.27072223438081 | 1.1469368456468 | 1.40786740183514 | 4.61081640676703e-06 | 0.0134220865600988 |
| IDUA | 0.167127069672216 | 0.0364929092419804 | 1.18190443997662 | 1.10031991304011 | 1.26953814857072 | 4.65613251946677e-06 | 0.0135540017641678 |
| PHYKPL | 0.173671233616527 | 0.0379524899706638 | 1.18966437986378 | 1.10438028906576 | 1.28153440506795 | 4.73912390760621e-06 | 0.0137955896950417 |
| HNRNPUL1 | 0.16113264094474 | 0.0352419761865923 | 1.17484079047184 | 1.09642881615263 | 1.25886045917674 | 4.82677177946847e-06 | 0.0140507326500327 |
| PON1 | -0.165748789 | 0.0362882585720421 | 0.847259047855589 | 0.789090883728647 | 0.909715102500176 | 4.93435033061592e-06 | 0.0143638938124229 |
| KLRF1 | 0.186860699407356 | 0.0411945232367889 | 1.20545935215146 | 1.11195467361857 | 1.30682687358161 | 5.73157356797679e-06 | 0.0166846106563804 |
| DNPEP | 0.170319097106039 | 0.0375496111482939 | 1.18568313902024 | 1.10155394397349 | 1.27623754955275 | 5.7374167058473e-06 | 0.0167016200307215 |
| PARP1 | 0.153740177961058 | 0.0339148749458597 | 1.16618784610786 | 1.09118801319031 | 1.24634258805085 | 5.8118936889939e-06 | 0.0169184225286612 |
| FNTA | 0.155932956647092 | 0.0344327035769523 | 1.16874784368902 | 1.09247400935032 | 1.2503469285645 | 5.9367496139432e-06 | 0.0172818781261887 |
| KLB | -0.159915792 | 0.0353516427242305 | 0.852215549114429 | 0.795165498347476 | 0.913358720494985 | 6.08038815067818e-06 | 0.0177000099066242 |
| F7 | 0.178348644545829 | 0.0394852827914164 | 1.19524196319202 | 1.10622961524677 | 1.2914166560768 | 6.27697483810376e-06 | 0.0182722737537201 |
| TOP2B | 0.168058071653248 | 0.0372092013201932 | 1.18300530772714 | 1.09979966123316 | 1.2725059003395 | 6.28484763996809e-06 | 0.0182951914799471 |
| TXNRD1 | 0.158468247749465 | 0.0350866061434837 | 1.17171471905521 | 1.09384443956598 | 1.25512854770774 | 6.28735757026296e-06 | 0.0183024978870355 |
| PRUNE2 | 0.157873682490765 | 0.0349588249080426 | 1.17101826525429 | 1.09346809709585 | 1.25406839138807 | 6.30218188240335e-06 | 0.0183456514596762 |
| RNF149 | 0.187227433836589 | 0.0414704880393622 | 1.20590151667245 | 1.11176103625336 | 1.30801352133511 | 6.34019757167143e-06 | 0.0184563151311355 |
| IQGAP2 | 0.157380025551838 | 0.0349612541084845 | 1.17044032662548 | 1.09292322852346 | 1.25345543258508 | 6.74579462995392e-06 | 0.0196370081677959 |
| PPL | 0.162657855319573 | 0.0361455950251829 | 1.17663404173228 | 1.09615926096673 | 1.26301689678035 | 6.79297845718994e-06 | 0.0197743602888799 |
| GRHPR | 0.169165907556944 | 0.037717865060547 | 1.18431660970089 | 1.09992158625235 | 1.27518711292172 | 7.29023056925218e-06 | 0.0212218611870931 |
| GIPC2 | 0.180923761722032 | 0.040365291091231 | 1.19832381766631 | 1.10717064331551 | 1.29698161765399 | 7.38907205512284e-06 | 0.0215095887524626 |
| LGMN | 0.160308241404603 | 0.0357684045163942 | 1.17387265138599 | 1.09439551369842 | 1.25912157389535 | 7.40024574169087e-06 | 0.0215421153540621 |
| EDIL3 | -0.17139233 | 0.0383540697212427 | 0.84249097441389 | 0.781479542779796 | 0.908265671861445 | 7.87012223224566e-06 | 0.0229099258180671 |
| HDGFL2 | 0.165008804421069 | 0.0369278028175948 | 1.17940350263073 | 1.09705609061116 | 1.26793209018394 | 7.88007510285387e-06 | 0.0229388986244076 |
| DKKL1 | -0.157324452 | 0.0353224775719818 | 0.854426793294092 | 0.797274288571702 | 0.915676267958778 | 8.43058188952707e-06 | 0.0245414238804133 |
| PSIP1 | 0.15649881776691 | 0.0352013080714308 | 1.16940937980376 | 1.09144690739027 | 1.25294074160955 | 8.75556390070288e-06 | 0.0254874465149461 |
| SPINK6 | 0.16642782750632 | 0.0375133305460288 | 1.18107829142874 | 1.09735385968233 | 1.27119061748052 | 9.14340533048881e-06 | 0.0266164529170529 |
| HSPA2 | 0.170974866582946 | 0.038539377316018 | 1.18646092882963 | 1.10014026690548 | 1.27955459679598 | 9.14893229262141e-06 | 0.0266325419038209 |
| NMNAT1 | 0.156597006932052 | 0.0353078043787881 | 1.16952420877186 | 1.09132626159132 | 1.2533253556173 | 9.19888695004458e-06 | 0.0267779599115798 |
| LACRT | -0.184340557 | 0.0415650702057874 | 0.831652530765628 | 0.766586225661661 | 0.902241533666868 | 9.20777353763993e-06 | 0.0268038287680698 |
| GPI | 0.163317896024148 | 0.0368259261479961 | 1.17741092445312 | 1.09542134671318 | 1.26553721924549 | 9.21313382831536e-06 | 0.026819432574226 |
| HEPACAM2 | -0.165308559 | 0.0373814112741743 | 0.847632119328213 | 0.78774871863305 | 0.912067760597047 | 9.76951225749704e-06 | 0.0284390501815739 |
| ITGB1 | -0.168919329 | 0.0382535818008054 | 0.844577033572726 | 0.783568847546771 | 0.910335279244149 | 1.00647288912692e-05 | 0.0292984258024848 |
| PILRB | 0.16626134451128 | 0.0377409263804185 | 1.18088167834422 | 1.09668185856237 | 1.27154609822495 | 1.05621547478455e-05 | 0.0307464324709782 |
| A1BG | 0.17679274418094 | 0.0401326393473667 | 1.1933837317717 | 1.10310923636877 | 1.29104596743786 | 1.05680961725765e-05 | 0.0307637279583703 |
| IGF2R | 0.16507740672636 | 0.0374874094700574 | 1.17948441520524 | 1.09592864794328 | 1.2694106393905 | 1.06497331479433e-05 | 0.0310013731936631 |
| CXCL12 | -0.159365934 | 0.0362295640885751 | 0.852684275853202 | 0.794235009779868 | 0.915434934666021 | 1.08860392192975e-05 | 0.031689260167375 |
| NAGK | 0.162990865518457 | 0.0370730161365585 | 1.17702593811765 | 1.09453296235986 | 1.26573626071049 | 1.10019242131531e-05 | 0.0320266013844887 |
| COL18A1 | 0.183213047322654 | 0.0417295666304564 | 1.20107026562939 | 1.10674480282139 | 1.30343488336386 | 1.13097980539474e-05 | 0.0329228221350408 |
| GM2A | 0.17388778045235 | 0.0396317019176372 | 1.18992202581613 | 1.10098985648224 | 1.28603766800025 | 1.14611957708239e-05 | 0.0333635408888683 |
| ULBP2 | 0.181291522598037 | 0.0413327530884566 | 1.19876459532865 | 1.10547966476802 | 1.29992129282182 | 1.15376270676931e-05 | 0.0335860323940545 |
| CLEC7A | 0.173394916145654 | 0.0395441037325155 | 1.1893357002232 | 1.10063630629617 | 1.28518330690499 | 1.16066363526318e-05 | 0.0337869184225111 |
| PPP3R1 | 0.155446823528058 | 0.0354651622699821 | 1.16817981473443 | 1.08973560814005 | 1.25227079794347 | 1.17010390751734e-05 | 0.0340617247478298 |
| CD109 | 0.16160915515204 | 0.0369091192670192 | 1.17540075220409 | 1.09337285549006 | 1.26358261168163 | 1.19460678695358e-05 | 0.0347750035682187 |
| CD48 | 0.160114633790887 | 0.036590786388321 | 1.17364540270239 | 1.09242139142497 | 1.26090860367327 | 1.20977744219372e-05 | 0.0352166213422593 |
| CLEC6A | 0.15785511541297 | 0.0360900203620535 | 1.17099652306891 | 1.09102615011317 | 1.25682858921139 | 1.22031186430319e-05 | 0.0355232783698659 |
| PRKRA | 0.153337330247468 | 0.035080040323522 | 1.16571814461587 | 1.08826039257931 | 1.24868901041773 | 1.23638846831311e-05 | 0.0359912683125946 |
| FMNL1 | 0.154840826972591 | 0.0354381216435262 | 1.16747211624362 | 1.08913315428976 | 1.25144582812298 | 1.24628654434314e-05 | 0.0362794013058287 |
| TRIM24 | 0.160105178848377 | 0.0366439419060463 | 1.17363430600504 | 1.09229725597672 | 1.26102805504191 | 1.24695231109711e-05 | 0.036298781776037 |
| SLIT2 | 0.152191534499111 | 0.0349898464498115 | 1.16438323463512 | 1.08720636188105 | 1.24703861625093 | 1.36391440484266e-05 | 0.0397035483249697 |
| PTH | 0.17958575644379 | 0.0413745522512411 | 1.19672152624946 | 1.10350517246611 | 1.29781214182104 | 1.42166493731084e-05 | 0.0413846663251186 |
| CD160 | 0.165991431102859 | 0.0384339632211256 | 1.18056298555714 | 1.09489762219972 | 1.27293085180649 | 1.56827527855402e-05 | 0.0456524933587076 |
| ADGRD1 | 0.185280612773192 | 0.0429123855045915 | 1.2035561259682 | 1.10646731079401 | 1.30916416077045 | 1.57700041599662e-05 | 0.0459064821096615 |
| ZNRD2 | 0.1619920700245 | 0.0375273454425746 | 1.17585091681507 | 1.09246703427649 | 1.26559917617148 | 1.58421651020475e-05 | 0.0461165426120604 |
| UBE2L6 | 0.159633829597919 | 0.0370385635914691 | 1.17308124470735 | 1.0909384018145 | 1.2614090808384 | 1.63301978934563e-05 | 0.0475372060678513 |
| MBL2 | -0.15911873 | 0.0369247843217494 | 0.852895088710796 | 0.79334959183467 | 0.916909821135433 | 1.63797015925883e-05 | 0.0476813113360246 |
| DAG1 | 0.153727703117608 | 0.0356758717530614 | 1.16617329818779 | 1.08741464601947 | 1.25063623741354 | 1.63986643058017e-05 | 0.0477365117941888 |
| NPPC | 0.19012926672882 | 0.0441959455397071 | 1.20940592350072 | 1.10905157535821 | 1.31884099918995 | 1.69292549441012e-05 | 0.0492810611422787 |

**Table S2**. Proteins related to depression were identified by the LASSO regression analysis.

| **Protein** | **Coefficient** |
| --- | --- |
| LDLR | 0.378855236039165 |
| FABP4 | 0.276436178058289 |
| LPL | -0.23338662 |
| IGFBP1 | -0.212467174 |
| CA14 | -0.163510684 |
| SMOC1 | 0.149740338372062 |
| APOC1 | -0.147621057 |
| FGFBP1 | -0.134772659 |
| PRSS8 | 0.131814156925861 |
| PON3 | -0.128235052 |
| LEP | 0.128224912144276 |
| APOM | -0.118035311 |
| ADGRG1 | 0.113241625119487 |
| CDH2 | 0.108031741081615 |
| IGSF3 | 0.10771575887338 |
| MEP1A | 0.106329352807534 |
| MXRA8 | -0.102381942 |
| PLA2G1B | -0.09937356 |
| TNFRSF10A | 0.092137846772007 |
| PCSK9 | 0.0901098586709095 |
| ADM | 0.0889178517498247 |
| NCAN | -0.079850831 |
| CLUL1 | -0.076331108 |
| PRRT3 | -0.07580972 |
| PODXL2 | -0.070250943 |
| CTSO | 0.0655632560538011 |
| PIK3IP1 | 0.0636554618659741 |
| BPIFB1 | -0.061084305 |
| CD109 | 0.0608034565881027 |
| PTPRR | -0.060021963 |
| HAVCR1 | 0.0596874229656949 |
| MET | -0.056964683 |
| MVK | 0.055822562026973 |
| SERPIND1 | 0.0538372525397444 |
| ENG | -0.053774628 |
| HSPA2 | 0.0520381052276897 |
| LECT2 | 0.05000040955577 |
| MATN3 | -0.049937341 |
| CA6 | -0.046781855 |
| IL7R | -0.046696929 |
| WIF1 | -0.046032618 |
| SCARA5 | 0.0452304745940096 |
| PLTP | -0.045136289 |
| CEACAM16 | 0.0410800126568273 |
| HSD11B1 | -0.040618039 |
| PLXNB2 | 0.0400163664035357 |
| FGF23 | 0.0356235381379979 |
| ACE2 | 0.0353870731457444 |
| NFATC3 | 0.0331730166269006 |
| SSC5D | 0.0323551415916773 |
| UMOD | -0.032018939 |
| CTSV | -0.031889764 |
| PRAP1 | 0.0311907362195703 |
| CLEC6A | -0.02994626 |
| SCG3 | -0.029055053 |
| REN | 0.0284945239224391 |
| APOF | -0.028281909 |
| ITGBL1 | 0.0275895252135778 |
| ESM1 | -0.026377342 |
| PLIN1 | 0.0253925847551348 |
| CALB2 | 0.0246001343623977 |
| ANGPT2 | 0.0241448912942671 |
| NFASC | 0.0234925253620646 |
| HEG1 | 0.0225575131025064 |
| GIPC2 | 0.0224338275047093 |
| GH1 | -0.021532296 |
| TNFRSF11A | 0.0204158091593011 |
| RTN4R | 0.0203888842916897 |
| RAB6A | -0.020219217 |
| PTS | 0.0198718163792721 |
| CRISP2 | -0.01960169 |
| ICAM4 | -0.019512337 |
| MBL2 | -0.019164556 |
| ADIPOQ | -0.018317891 |
| CD4 | 0.0176796447627311 |
| FGA | 0.0146622950705916 |
| SIT1 | 0.0145178618628399 |
| AGER | -0.0145127 |
| OPTC | -0.014043237 |
| SPON2 | -0.012678325 |
| MYBPC1 | 0.0123062953097836 |
| SNCG | 0.0111989716120494 |
| LGALS4 | 0.0100703061803625 |
| THBS4 | 0.00909932979639273 |
| CRELD1 | 0.00618000183233034 |
| ADGRG2 | -0.005513969 |
| OXT | 0.00406290132890552 |
| PTPRN2 | -0.002893334 |
| CRIP2 | 0.00247132118745917 |
| KIT | -0.001087912 |
| CREG1 | -0.000573272 |
| SKAP1 | 9.37156918192688e-05 |
| F9 | 6.21418745725771e-05 |

**Table S3.** Mediation effects underlying proteomic scores and neuroimaging-depression association.

| **Mediator** | **TE Estimate** | **TE P_val** | **NDE Estimate** | **NDE P_val** | **NIE Estimate** | **NIE P_val** | **PM Estimate** | **PM P_val** | **PM 95CI_Low** | **PM 95CI_High** | **Sample Size** |
| --- | --- | --- | --- | --- | --- | --- | --- | --- | --- | --- | --- |
| Protein Score | 1.5366 | 0.048 | 1.188 | 0.472 | 1.2935 | 0.002 | 0.6497 | 0.05 | 0.0095 | 3.2956 | 7015 |

**Table S4**. Mediation analysis by protein levels.

| Protein | PM_Estimate | PM_P_val | PM_95CI_Low | PM_95CI_High | TE_Estimate | TE_P_val |
| --- | --- | --- | --- | --- | --- | --- |
| LDLR | 0.0946 | 0.198 | -0.0634 | 0.6069 | 1.5569 | 0.042 |
| FABP4 | 0.3188 | 0.062 | -0.0346 | 1.7795 | 1.55 | 0.044 |
| LPL | -0.1098 | 0.194 | -0.5673 | 0.0963 | 1.5719 | 0.042 |
| IGFBP1 | 0.0991 | 0.432 | -0.2253 | 0.6906 | 1.5628 | 0.042 |
| CA14 | 0.0592 | 0.6 | -0.2951 | 0.5423 | 1.567 | 0.042 |
| SMOC1 | 0.0497 | 0.232 | -0.0619 | 0.2435 | 1.5642 | 0.044 |
| APOC1 | -0.0446 | 0.616 | -0.4421 | 0.2083 | 1.5693 | 0.04 |
| FGFBP1 | -0.0877 | 0.396 | -0.7082 | 0.1205 | 1.5624 | 0.044 |
| PRSS8 | 0.1518 | 0.07 | -0.0256 | 0.7508 | 1.5635 | 0.042 |
| PON3 | 0.1027 | 0.43 | -0.2505 | 0.6115 | 1.5635 | 0.042 |
| LEP | 0.5626 | 0.04 | 0.1443 | 2.6312 | 1.5677 | 0.038 |
| APOM | -0.2542 | 0.052 | -1.685 | 0.0015 | 1.5659 | 0.046 |
| ADGRG1 | 0.1656 | 0.132 | -0.1153 | 0.9649 | 1.5721 | 0.044 |
| CDH2 | 0.0809 | 0.314 | -0.1377 | 0.6815 | 1.5636 | 0.042 |
| IGSF3 | 0.0763 | 0.36 | -0.1565 | 0.5089 | 1.5695 | 0.042 |
| MEP1A | 0.0574 | 0.31 | -0.0697 | 0.3417 | 1.5685 | 0.042 |
| MXRA8 | -0.0047 | 0.934 | -0.3275 | 0.5429 | 1.5673 | 0.042 |
| PLA2G1B | 0.0551 | 0.53 | -0.1699 | 0.4357 | 1.5605 | 0.046 |
| TNFRSF10A | 0.169 | 0.044 | 0.0365 | 0.8229 | 1.5671 | 0.042 |
| PCSK9 | 0.0709 | 0.132 | -0.0286 | 0.3952 | 1.5639 | 0.042 |
| ADM | 0.1873 | 0.114 | -0.0649 | 0.9786 | 1.5571 | 0.042 |
| NCAN | 0.0159 | 0.88 | -0.2525 | 0.3039 | 1.5655 | 0.042 |
| CLUL1 | 0.0751 | 0.352 | -0.1789 | 0.452 | 1.5606 | 0.042 |
| PRRT3 | -0.0148 | 0.826 | -0.2499 | 0.2535 | 1.5686 | 0.046 |
| PODXL2 | -0.084 | 0.168 | -0.4662 | 0.0594 | 1.5749 | 0.042 |
| CTSO | 0.0791 | 0.302 | -0.1391 | 0.4337 | 1.5655 | 0.044 |
| PIK3IP1 | 0.0902 | 0.064 | -0.0119 | 0.4036 | 1.5791 | 0.04 |
| BPIFB1 | 0.0722 | 0.324 | -0.1489 | 0.3863 | 1.5658 | 0.044 |
| CD109 | 0.0479 | 0.126 | -0.0287 | 0.2584 | 1.5739 | 0.04 |
| PTPRR | 0.0107 | 0.836 | -0.1977 | 0.2256 | 1.5667 | 0.042 |
| HAVCR1 | 0.0345 | 0.342 | -0.0715 | 0.2382 | 1.57 | 0.042 |
| MET | -0.0583 | 0.464 | -0.3927 | 0.1455 | 1.5718 | 0.04 |
| MVK | 0.0566 | 0.414 | -0.117 | 0.3612 | 1.5652 | 0.044 |
| SERPIND1 | 0.033 | 0.624 | -0.1548 | 0.3068 | 1.564 | 0.044 |
| ENG | -0.0198 | 0.572 | -0.189 | 0.1023 | 1.5705 | 0.042 |
| HSPA2 | -0.0145 | 0.582 | -0.1286 | 0.062 | 1.5666 | 0.044 |
| LECT2 | -0.0154 | 0.67 | -0.1986 | 0.0752 | 1.5679 | 0.042 |
| MATN3 | -0.0212 | 0.678 | -0.1977 | 0.1617 | 1.5677 | 0.044 |
| CA6 | -0.0247 | 0.758 | -0.2722 | 0.1612 | 1.5696 | 0.04 |
| IL7R | -0.0588 | 0.288 | -0.3561 | 0.0696 | 1.5668 | 0.042 |
| WIF1 | 0.0276 | 0.462 | -0.0741 | 0.2369 | 1.5642 | 0.042 |
| SCARA5 | 0.1013 | 0.05 | 0.0015 | 0.5186 | 1.5778 | 0.04 |
| PLTP | 0.0374 | 0.784 | -0.3175 | 0.5084 | 1.5634 | 0.044 |
| CEACAM16 | -0.0349 | 0.38 | -0.2773 | 0.0683 | 1.5643 | 0.042 |
| HSD11B1 | 0.0535 | 0.628 | -0.2511 | 0.5275 | 1.5635 | 0.046 |
| PLXNB2 | 0.122 | 0.052 | -0.0062 | 0.5649 | 1.5857 | 0.036 |
| FGF23 | 0.0765 | 0.092 | -0.0343 | 0.4486 | 1.5643 | 0.042 |
| ACE2 | 0.1839 | 0.052 | -0.0012 | 1.0011 | 1.5561 | 0.046 |
| NFATC3 | -0.0864 | 0.16 | -0.5352 | 0.0774 | 1.5625 | 0.044 |
| SSC5D | 0.1902 | 0.052 | -0.002 | 0.8502 | 1.5641 | 0.046 |
| UMOD | -0.0054 | 0.858 | -0.2234 | 0.1489 | 1.5671 | 0.044 |
| CTSV | 0.0169 | 0.604 | -0.0665 | 0.1485 | 1.5647 | 0.042 |
| PRAP1 | 0.2978 | 0.046 | 0.0297 | 1.5219 | 1.5588 | 0.04 |
| CLEC6A | 0.0242 | 0.512 | -0.112 | 0.1429 | 1.5643 | 0.042 |
| SCG3 | -0.1045 | 0.126 | -0.5114 | 0.0677 | 1.5785 | 0.042 |
| REN | 0.0523 | 0.286 | -0.0598 | 0.2569 | 1.5699 | 0.042 |
| APOF | 0.0994 | 0.272 | -0.2046 | 0.6733 | 1.5654 | 0.042 |
| ITGBL1 | 0.0828 | 0.1 | -0.0463 | 0.3656 | 1.5786 | 0.042 |
| ESM1 | 0.0401 | 0.554 | -0.1377 | 0.4561 | 1.5623 | 0.044 |
| PLIN1 | 0.1622 | 0.078 | -0.0435 | 0.9205 | 1.5563 | 0.042 |
| CALB2 | 0.1033 | 0.212 | -0.1003 | 0.4921 | 1.5629 | 0.042 |
| ANGPT2 | -0.0395 | 0.344 | -0.2828 | 0.0865 | 1.5651 | 0.044 |
| NFASC | 0.0834 | 0.086 | -0.0278 | 0.5284 | 1.5707 | 0.04 |
| HEG1 | 0.1092 | 0.052 | -0.001 | 0.5394 | 1.5582 | 0.042 |
| GIPC2 | -0.0023 | 0.976 | -0.1351 | 0.0967 | 1.5669 | 0.042 |
| GH1 | 0.0864 | 0.164 | -0.0594 | 0.5241 | 1.5599 | 0.042 |
| TNFRSF11A | 0.0756 | 0.41 | -0.1805 | 0.3961 | 1.5671 | 0.042 |
| RTN4R | 0.1236 | 0.248 | -0.1265 | 0.701 | 1.5597 | 0.042 |
| RAB6A | -0.0206 | 0.686 | -0.2252 | 0.1179 | 1.5672 | 0.042 |
| PTS | 0.1234 | 0.176 | -0.0866 | 0.7654 | 1.5592 | 0.044 |
| CRISP2 | 0.0026 | 0.944 | -0.1699 | 0.1387 | 1.5669 | 0.04 |
| ICAM4 | 0.034 | 0.338 | -0.0767 | 0.1876 | 1.5679 | 0.044 |
| MBL2 | -0.0135 | 0.69 | -0.1621 | 0.0997 | 1.5669 | 0.042 |
| ADIPOQ | 0.0653 | 0.584 | -0.2856 | 0.5617 | 1.5617 | 0.044 |
| CD4 | 0.1332 | 0.044 | 0.0169 | 0.5546 | 1.5648 | 0.042 |
| FGA | 0.0135 | 0.814 | -0.1509 | 0.2415 | 1.5652 | 0.044 |
| SIT1 | 0.0258 | 0.8 | -0.2241 | 0.3198 | 1.5649 | 0.044 |
| AGER | -0.015 | 0.784 | -0.154 | 0.1544 | 1.5696 | 0.042 |
| OPTC | 0.0276 | 0.66 | -0.1071 | 0.3111 | 1.5636 | 0.042 |
| SPON2 | 0.1574 | 0.046 | 0.0073 | 0.7113 | 1.5748 | 0.042 |
| MYBPC1 | 0.0271 | 0.57 | -0.1152 | 0.2707 | 1.5673 | 0.042 |
| SNCG | 0.1113 | 0.116 | -0.0591 | 0.6522 | 1.5611 | 0.042 |
| LGALS4 | 0.0164 | 0.666 | -0.132 | 0.1629 | 1.569 | 0.044 |
| THBS4 | 0.191 | 0.046 | 0.029 | 1.1692 | 1.5654 | 0.042 |
| CRELD1 | 0.2197 | 0.046 | 0.0036 | 1.1202 | 1.5561 | 0.04 |
| ADGRG2 | 0.0801 | 0.344 | -0.1669 | 0.4646 | 1.5619 | 0.042 |
| OXT | -0.0174 | 0.85 | -0.3131 | 0.3815 | 1.567 | 0.042 |
| PTPRN2 | -0.0243 | 0.718 | -0.3213 | 0.163 | 1.5678 | 0.042 |
| CRIP2 | 0.0488 | 0.248 | -0.0509 | 0.297 | 1.5589 | 0.046 |
| KIT | 0.1189 | 0.048 | 0.0085 | 0.5171 | 1.5679 | 0.04 |
| CREG1 | 0.0368 | 0.408 | -0.0584 | 0.2326 | 1.563 | 0.042 |
| SKAP1 | 0.0028 | 0.964 | -0.1424 | 0.181 | 1.5665 | 0.042 |
| F9 | 0.0333 | 0.698 | -0.2133 | 0.4305 | 1.5654 | 0.042 |

**Table S5**. Mediation analysis by neuroimaging.

| Brain structure | PM_Estimate | PM_P_val | PM_95CI_Low | PM_95CI_High | TE_Estimate | TE_P_val |
| --- | --- | --- | --- | --- | --- | --- |
| Hippocampus_Total_Mean | -0.0328 | 0.188 | -0.209 | 0.0271 | 1.5641 | 0.042 |
| Hippocampus_GM_Mean | -0.0043 | 0.732 | -0.0567 | 0.0345 | 1.5665 | 0.042 |
| SuperiorFrontal_GM_Mean | 0.0016 | 0.916 | -0.0443 | 0.0393 | 1.567 | 0.042 |
| MiddleFrontal_GM_Mean | -0.0115 | 0.494 | -0.1 | 0.022 | 1.5619 | 0.042 |
| FrontalPole_GM_Mean | -0.0078 | 0.59 | -0.0677 | 0.0267 | 1.5664 | 0.042 |
| Precentral_GM_Mean | 0.002 | 0.842 | -0.0422 | 0.0542 | 1.5644 | 0.042 |
| Precuneus_GM_Mean | -0.0043 | 0.704 | -0.0517 | 0.0234 | 1.5633 | 0.042 |
| Postcentral_GM_Mean | 0.0027 | 0.87 | -0.0481 | 0.0517 | 1.5687 | 0.042 |
| Caudate_Mean | -0.0023 | 0.948 | -0.0591 | 0.0598 | 1.5666 | 0.042 |
| Thalamus_Mean | -0.0221 | 0.31 | -0.1733 | 0.0273 | 1.5581 | 0.042 |
| Putamen_Mean | -0.0013 | 0.98 | -0.0423 | 0.0354 | 1.569 | 0.042 |
| Amygdala_Mean | -0.0035 | 0.78 | -0.0659 | 0.0311 | 1.5673 | 0.04 |
| InferiorFrontal_GM_Mean | -0.001 | 0.99 | -0.0318 | 0.0359 | 1.5673 | 0.042 |
| InferiorTemporal_GM_Mean | 0.0075 | 0.61 | -0.0284 | 0.0778 | 1.5638 | 0.046 |
| Parahippocampal_GM_Mean | -0.0027 | 0.854 | -0.0567 | 0.0328 | 1.5661 | 0.042 |
| MiddleTemporal_GM_Mean | 3e-04 | 0.99 | -0.029 | 0.0333 | 1.5668 | 0.042 |
| Total_Brain_Vol | 0.0397 | 0.114 | -0.0272 | 0.2546 | 1.5624 | 0.044 |
| Total_WM_Vol | -0.0259 | 0.18 | -0.1953 | 0.0139 | 1.5635 | 0.042 |
| Total_GM_Vol | 0.1146 | 0.046 | 0.0147 | 0.5806 | 1.5624 | 0.046 |

**Table S6**. Mediation analysis of proteomic scores and neuroimaging in stroke and cerebral hemorrhage.

| Stroke | TE  Estimate | TE  P_val | NDE  Estimate | NDE  P_val | NIE  Estimate | NIE  P_val | PM  Estimate | PM  P_val | PM  95CI_Low | PM  95CI_High |
| --- | --- | --- | --- | --- | --- | --- | --- | --- | --- | --- |
|  | 2.0331 | 0.238 | 2.2613 | 0.266 | 0.8991 | 0.794 | -0.2208 | 0.776 | -3.9501 | 2.8274 |

| Cerebral hemorrhage | TE  Estimate | TE  P_val | NDE  Estimate | NDE  P_val | NIE  Estimate | NIE  P_val | PM  Estimate | PM  P_val | PM  95CI_Low | PM  95CI_High |
| --- | --- | --- | --- | --- | --- | --- | --- | --- | --- | --- |
|  | 0.9714 | 0.902 | 0.5364 | 0.342 | 1.811 | 0.164 | -15.2155 | 0.898 | -8.3041 | 10.1749 |
