# Supplementary material
Source: Research Square preprint supplement (doi:10.21203/rs.3.rs-9620492/v1)
Supplement: Supplementary file 2 [file eaf5b2a2ba32a9e218c851fd.docx]

**Fig.1.** MetS association with incident depression. A, Kaplan-Meier survival curves showing survival probability without depression stratified by groups. B, cumulative incidence function curves(CIF) showing cumulative incidence of depression stratified by groups. P values are calculated using the log-rank test.

**Fig.2.** Hazard Ratio for the incident depression in subgroups.

**Fig.3**. Identified depression-related proteins by Bonferroni correction and LASSO

regression analysis. A, volcano plot showing the characteristics of identified proteins.

B, The cross-validation curve of LASSO regression. C, LASSO coefficient profiles of

the identified proteins.

**Fig.4**. Association between depression-related proteins and brain structure. The

heatmap showed the extensive associations of the identified proteins with the brain

macrostructure by pearson correlation analysis.

**Fig.5**. Biological function analysis of depression-related proteins. A, cellular

components of identified proteins. B, biological process of identified proteins. C,

molecular function of identified proteins. D, biological pathway enrichment analysis.

**Fig.S1**. The distribution of the protein between two groups.
